## An unexpected lack of difference in superoxide/H<sub>2</sub>O<sub>2</sub> production rates in isolated heart and skeletal muscle mitochondria from a mouse model of Barth Syndrome

Renata L. S. Goncalves<sup>1,\*</sup>, Michael Schlame<sup>2</sup>, Alexander Bartelt<sup>1,3</sup>, Martin D Brand<sup>4</sup>, Gökhan S Hotamışlıgil<sup>1,5</sup>

<sup>1</sup>Sabri Ülker Center for Metabolic Research and Department of Molecular Metabolism, Harvard T.H. Chan School of Public Health, Boston, MA, U.S.A.

<sup>2</sup>Departments of Anesthesiology and Cell Biology, New York University School of Medicine, New York, NY, United States.

<sup>3</sup>Institute for Cardiovascular Prevention (IPEK), Pettenkoferstr. 9, Ludwig-Maximilians-University, 81377 Munich, Germany

<sup>4</sup>Buck Institute for Research on Aging, 8001 Redwood Blvd, Novato, CA 94945, U.S.A.

<sup>5</sup>Broad Institute of MIT and Harvard, Cambridge, MA USA

Running title: Mitochondrial superoxide/H<sub>2</sub>O<sub>2</sub> generation in tazkd mice

\*Corresponding author: Renata L.S. Goncalves, Sabri Ülker Center for Metabolic Research and Department of Molecular Metabolism, Harvard T.H. Chan School of Public Health, Boston, MA, U.S.A. email: [rgoncal@hsph.harvard.edu](mailto:rgoncal@hsph.harvard.edu).

Keywords: Barth syndrome, tafazzin, mitochondria, superoxide/H<sub>2</sub>O<sub>2</sub>, tazkd mice, “*ex vivo*” rate of superoxide/H<sub>2</sub>O<sub>2</sub> production, cardiomyopathy, mitochondrial reactive oxygen species (ROS)

## Abstract

Barth Syndrome (BTHS) is a rare X-linked genetic disorder caused by mutations in tafazzin and characterized by loss of cardiolipin and severe cardiomyopathy. Mitochondrial superoxide/H<sub>2</sub>O<sub>2</sub> production has been implicated in the cardiomyopathy observed in different BTHS models. There are at least 11 mitochondrial sites that produce superoxide/H<sub>2</sub>O<sub>2</sub> at significant rates. Which of these sites generate oxidants at excessive rates in BTHS is unknown. Here, we measured the maximum capacity of superoxide/H<sub>2</sub>O<sub>2</sub> production from each site in mitochondria isolated from heart and skeletal muscle of the tafazzin knockdown mice (*tazkd*) at 3, 7 and 12 months of age. Strikingly, the superoxide/H<sub>2</sub>O<sub>2</sub> production capacities of these sites were overall indistinguishable between *tazkd* mice and their wildtype littermates across the time points analyzed. The only exception was site G<sub>Q</sub> in glycerol phosphate dehydrogenase, which was increased in the skeletal muscle of 7 months old *tazkd* mice. Mitochondrial superoxide/H<sub>2</sub>O<sub>2</sub> production was also measured *ex vivo* during the oxidation of a complex mixture of substrates mimicking either heart or skeletal muscle cytosol and was found to be indistinguishable between wildtype and *tazkd* mice. However, we consistently measured decreased FAD-linked respiration in mitochondria isolated from *tazkd* mice. We conclude that the maximum capacity and *ex vivo* rates of superoxide/H<sub>2</sub>O<sub>2</sub> production were not increased in mitochondria isolated from heart and skeletal muscle of *tazkd* mice, despite reduced oxidative capacity. Therefore, it seems unlikely that mitochondrial oxidants contribute to the development of cardiomyopathy in *tazkd* mice. These observations raise questions about the involvement of mitochondrial oxidants in BTHS pathology.

## Introduction

Cardiolipin (CL) is a unique phospholipid; it contains four acyl chains and is exclusively synthesized and found in the mitochondrial membranes (1). Cardiolipin interacts with a myriad of mitochondrial proteins and this interaction is critical for their function (2, 3). A

critical step in cardiolipin synthesis and maturation is the remodeling of its acyl chains to a highly symmetric and unsaturated profile (3, 4). Cardiolipin remodeling consists in removing a fatty acyl chain from the nascent molecule, generating a monolysocardiolipin (MLCL), which is further re-acylated by the transacylase, tafazzin (*taz*) (5) (Figure 1). In the heart and skeletal muscle, *taz*-mediated cardiolipin remodeling generates tetralinoleoyl cardiolipin (L<sub>4</sub>CL) molecules (4). Upon loss of *taz* the MLCL/CL ratio is dramatically increased (6, 7). Mutations in the *taz* gene cause a rare X-linked autosomal recessive disease, named after Dr. Peter Barth who first described the syndrome in 1981 (8). Barth syndrome (BTHS) has an early onset, affecting mostly infant male individuals and is characterized by cardiomyopathy, skeletal myopathy, neutropenia, high levels of 3-methylglutaconic acid in the urine and growth delay (3, 8, 9). Nearly a decade ago the first mouse model expressing an inducible short-hairpin RNA to promote *taz* knockdown (*tazkd*) became available (6, 10). *Tazkd* mice recapitulate many aspects of the disease in humans, however the symptoms in the murine model are characterized by a much later onset where cardiomyopathy becomes evident at 8 months (6, 11).

The abnormal cardiolipin profile due to the loss of *taz* is associated with mitochondrial dysfunction (3, 9, 10). In particular, mitochondrial production of reactive oxygen species (ROS) – from here referred to as superoxide and H<sub>2</sub>O<sub>2</sub> – is considered a key process in the pathogenesis of BTHS (3, 9, 12).

Mitochondrial superoxide/H<sub>2</sub>O<sub>2</sub> generation is not a single process; there are at least eleven sites in the respiratory chain and in different enzymes of substrate oxidation ( $\beta$ -oxidation, tricarboxylic acid cycle, and pyrimidine biosynthesis) that are able to generate significant amounts of these molecules (Figure 1). Each site has its own properties and maximum capacity to produce superoxide/H<sub>2</sub>O<sub>2</sub> (13). The sites are represented in Figure 1 as red circles and can be didactically separated into two groups based on the redox potential ( $E_h$ ) of their redox centers. The sites that operate close to the redox potential of NADH/NAD<sup>+</sup> ( $E_h \sim -280$  mV) are the sites in the dehydrogenase complexes of

branched-chain 2-oxoacids, 2-oxoadipate, pyruvate and 2-oxoglutarate, sites B<sub>F</sub>, A<sub>F</sub>, P<sub>F</sub> and O<sub>F</sub>, respectively, and site I<sub>F</sub> in complex I. These sites belong to the same isopotential group (14–16). The remaining sites, II<sub>F</sub> in complex II, E<sub>F</sub> in ETF:QOR, G<sub>Q</sub> and D<sub>Q</sub> in mitochondrial glycerol 3-phosphate and dihydroorotate dehydrogenase, respectively, and III<sub>Q<sub>o</sub></sub> in complex III, belong to the ubiquinone isopotential group (QH<sub>2</sub>/Q, E<sub>h</sub> ~ +20 mV) (14, 17–21).

The rate of superoxide/H<sub>2</sub>O<sub>2</sub> production and the contribution from each site heavily depend on the substrates being oxidized (22). For example, in skeletal muscle the rate of superoxide/H<sub>2</sub>O<sub>2</sub> production during the oxidation of succinate is 5-fold faster than the rate during the oxidation of glutamate plus malate. In addition, the sites engaged during the oxidation of succinate or glutamate plus malate are different. While site I<sub>Q</sub> is the predominant source of superoxide/H<sub>2</sub>O<sub>2</sub> when succinate is used as substrate, sites I<sub>F</sub>, III<sub>Q<sub>o</sub></sub> and O<sub>F</sub> contribute about equally to the rate measured during oxidation of glutamate plus malate (22). There is no *a priori* reason to expect that all sites are equally engaged in superoxide/H<sub>2</sub>O<sub>2</sub> production in any given context.

*In vivo* or in intact cells, mitochondria metabolize multiple substrates simultaneously, which implies that superoxide/H<sub>2</sub>O<sub>2</sub> is generated from multiple sites simultaneously. In addition, metabolic effectors, e.g. calcium, ADP or cytosolic pH, which modulate the rate of superoxide/H<sub>2</sub>O<sub>2</sub> production, vary according to the physiological or pathological context (23–25). Therefore, it is challenging to study site-specific superoxide/H<sub>2</sub>O<sub>2</sub> generation in intact cells or *in vivo*. Instead, the rate at maximum capacity in isolated mitochondria is widely measured and is often used as a proxy estimation for the generation of these oxidant molecules *in vivo*. However, the maximum capacity cannot be used to predict of the rate of superoxide/H<sub>2</sub>O<sub>2</sub> production *in vivo* or intact cells (22, 26). To overcome these difficulties, “*ex vivo*” media were carefully designed to mimic the cytosol of skeletal muscle at “rest” and during “exercise”. These media contained the physiological cytosolic concentrations of all substrates and effectors thought to be relevant to oxidative phosphorylation and superoxide/H<sub>2</sub>O<sub>2</sub>

production, allowing more realistic predictions of the rate of superoxide/H<sub>2</sub>O<sub>2</sub> production from *ex vivo* experiments to *in vivo* conditions (26).

Due to the fact that different groups have reported higher production rates of mitochondrial oxidants in heart and skeletal muscle in BTHS (7, 12, 27–35), together with the encouraging effects of some antioxidants, especially mitoTEMPO and linoleic acid (12, 35) for improving cardiomyopathy pathogenesis, mitochondrial superoxide/H<sub>2</sub>O<sub>2</sub> production is considered a key target for therapeutic interventions (3, 11, 12). However, the precise site(s) responsible for the abnormal production of mitochondrial oxidants in different tissues in BTHS are still unknown.

In the present study we isolated heart and skeletal muscle mitochondria from *tazkd* mice and systematically measured the maximum capacities of superoxide/H<sub>2</sub>O<sub>2</sub> production from all eleven sites (Figure 1) during the progression of BTHS disease. We took advantage of the late onset of disease in the mouse model to study the kinetics of superoxide/H<sub>2</sub>O<sub>2</sub> generation in pre-symptomatic 3-month old mice and at later time points where cardiomyopathy and skeletal myopathology are already established (7- and 12-month-old mice). Unexpectedly, our results indicate that there is no difference in the rate of superoxide/H<sub>2</sub>O<sub>2</sub> production between *tazkd* mice and their wildtype littermates in heart or skeletal muscle mitochondria during the course of the disease progression.

To estimate the production rate of mitochondrial oxidants *in vivo* in these tissues, superoxide/H<sub>2</sub>O<sub>2</sub> was measured “*ex vivo*” in media designed to mimic the cytosol of skeletal muscle (26) and heart. Strikingly, “*ex vivo*” rates of superoxide/H<sub>2</sub>O<sub>2</sub> production were not altered in *tazkd* mice in mitochondria from either tissue despite the consistent decrease in oxygen consumption and *in vivo* exercise intolerance. In this study, we provide a broad and systematic characterization of the maximum capacities of sites of superoxide/H<sub>2</sub>O<sub>2</sub> production in heart and muscle mitochondria from *tazkd* mice during the progression of BTHS. Our data suggest that i) the involvement of mitochondrial superoxide/H<sub>2</sub>O<sub>2</sub>

production in BTSH pathogenesis should be interpreted carefully and/or ii) in tazkd mice, cardiac and muscle pathologies may not be related to the production of mitochondrial oxidants.

## Results

### Tafazzin-deficiency, cardiolipin levels and metabolic characteristics

The tazkd mouse was the first animal model created to study how loss of tafazzin induces Barth syndrome cardiomyopathy (6, 10). In this model, an shRNA expression system under the control of doxycycline decreases tafazzin mRNA and protein levels (6, 10). In our experiments, transgenic males (B6.Cg-Gt(ROSA)26Sor<sup>tm37(H1)/tetO-RNAi:Taz/Arte/Zkhu.J</sup>) were crossed with wildtype females and kept on standard chow diet containing doxycycline. Tafazzin knockdown was induced prenatally and male littermates (wildtype and tazkd) were kept on doxycycline-containing rodent chow throughout the experiment. Figures 2A and B show that tafazzin mRNA levels in the tazkd mice were <30% of their wildtype littermates in both heart and skeletal muscle. The decreased tafazzin mRNA levels were accompanied by a more dramatic decrease in tafazzin protein levels, reaching undetectable levels in the heart as early as 3 months of age and up to one year old (Figure 2C, heart). In the tazkd mice skeletal muscle tafazzin protein levels were <15% of wildtype mice (Figure 2C, skeletal muscle 12 months old). To confirm that lower tafazzin levels resulted in altered cardiolipin remodeling, which is a characteristic of heart and skeletal muscle from BTSH patients, we measured the content of cardiolipin and monolysocardiolipin. In tazkd mice, MLCL accumulated in both tissues, which resulted in significant increases in the MLCL/CL ratio (Figure 2D) (6).

Consistent with previous reports, wildtype mice on doxycycline chow gained significantly more weight than their tazkd littermates (Figure 1E) (30, 33). Tazkd fat (FM) and fat free/lean (FFM) mass were ~3.5- and 1.4-fold lower than wildtype mice, respectively (Supplementary Figure 1A). We used indirect calorimetry to better understand whether differences in food intake or energy expenditure

were responsible for the alteration in bodyweight and composition between wildtype and tazkd mice 6-7 months of age. There was no difference in locomotor activity (supplementary Figure 2B). Food intake was higher in tazkd than wildtype mice (Supplementary Figure 2C), which was paralleled with a higher respiratory exchange ratio (RER) in tazkd mice (Supplementary Figure 2D and E). The RER is the ratio between the volume of CO<sub>2</sub> produced to the volume of O<sub>2</sub> consumed (VCO<sub>2</sub>/VO<sub>2</sub>) and indicates the metabolic substrate preferentially oxidized by the mouse. With an RER closer to 1.0 tazkd mice may oxidize exclusively carbohydrates in contrast to wildtype mice, which may have more substrate oxidation flexibility (RER = 0.9). Energy expenditure (EE) was also significantly higher in tazkd mice when normalized by total body weight (supplementary Figure 2 F-G). However, when EE was normalized by the metabolically active lean mass instead, the difference was no longer observed (Supplementary Figure 2H-I). These results indicate that the differences in EE between 6-7 months old wildtype and tazkd are mostly explained by the differences in body weight rather than differences in genotype. However, it is possible that tazkd have slightly higher EE, as we found that at 3 months of age, when body weight was not yet different, EE was already higher in tazkd mice compared to wildtype controls (Supplementary Figure 2 J-K), which is also in line with previous reports (30). Heart weight normalized by body weight was 34% higher in tazkd mice at 7 months of age indicating the characteristic heart hypertrophy (Figure 2F) (33).

### Tafazzin-deficiency impairs mitochondrial function and endurance capacity

Mitochondrial dysfunction, exercise intolerance, and decreased muscle strength and contractility are some of the hallmarks of cardioskeletal myopathy in BTSH (6, 10, 36, 37). Since cardiolipin interacts with every component of the electron transport chain, it is not surprising that in tazkd mice substrate oxidation and ATP synthesis are compromised (9, 38, 39).

Due to the late onset of the disease in this mouse model (6) and previous reports that at early age

mitochondrial oxygen consumption in cardiac mitochondria is not altered (40), we isolated mitochondria from 12-month old mice. As shown in Figure 3 A-B, loss of mature cardiolipin in tazkd mice resulted in lower ADP-stimulated oxygen consumption in heart and skeletal muscle isolated mitochondria oxidizing succinate + rotenone as substrate. Powers et al. (36), previously reported that 4-5-month old tazkd and their wildtype littermates can run for about 36 min to a total of 507.4 m. When we challenged 12-month old tazkd and wildtype mice in a treadmill, exercise endurance, as measured by running time and distance run, was significantly lower in tazkd mice (Figure 3 C-D). Although, the endurance difference between the genotypes was small, at 1 year of age wildtype mice were obese and weighed 1.6-fold more than tazkd mice ( $51 \pm 0.9$  g,  $n=11$  vs  $32.5 \pm 0.9$  g,  $n=17$ ;  $p<0.0001$ ). Considering that the endurance of obese mice is 5-6-fold lower than their lean littermates (41), the results from Figure 3 C-D stress the high degree of exercise intolerance of tazkd mice.

### Maximum capacities of the eleven sites of superoxide/H<sub>2</sub>O<sub>2</sub> production

Loss of cardiolipin in BTHS is associated with increased production of mitochondrial oxidants (7, 12, 27–35), which have been considered to have a causative role in the development of cardiomyopathy (12, 34, 35). However, other reports have failed to find differences in mitochondrial oxidant production in cardiac tissue of tazkd mice (40, 42). There are eleven sites associated with the electron transport chain and tricarboxylic acid cycle that are known to produce superoxide/H<sub>2</sub>O<sub>2</sub> at significant rates. Their maximum capacities and native uninhibited rates of superoxide/H<sub>2</sub>O<sub>2</sub> have been systematically characterized in rat skeletal muscle mitochondria (13, 26). Complex I and complex III are often credited as the main source of mitochondrial oxidants (43–45). Indeed, complex I-III activity is decreased in tazkd cardiac mitochondria (36, 37, 42), however, whether this reflects higher superoxide/H<sub>2</sub>O<sub>2</sub> production from these sites or other adjacent sites in tazkd mice is not yet known. We hypothesized that mitochondrial superoxide/ H<sub>2</sub>O<sub>2</sub> generation would be higher in tazkd mice cardiac and skeletal muscle

mitochondria and our objective was to identify the site(s) that produced excess oxidants.

**Cardiac mitochondria** – To gain insight into the dynamics of superoxide/H<sub>2</sub>O<sub>2</sub> production in cardiac mitochondria in BTHS, the maximum capacities of the eleven sites were measured in heart mitochondria isolated from wildtype and tazkd mice at 3, 7 and 12 months of age (Figure 4). To compare the maximum rate of H<sub>2</sub>O<sub>2</sub> generation from each site between the two genotypes, we pharmacologically isolated the sites in intact mitochondria by providing the appropriate combination of inhibitors and substrates at saturating concentrations (see experimental procedures). The sites with the highest maximum capacities were: III<sub>Q<sub>o</sub></sub> in complex III, I<sub>Q</sub> in complex I and II<sub>F</sub> in complex II (Figure 4). The maximum capacities of the sites I<sub>Q</sub> and III<sub>Q<sub>o</sub></sub> were higher at 7 months of age in wildtype mice (2-way ANOVA, age:  $p<0.003$ , interaction  $p=0.1727$ ) but this difference was absent in tazkd mice (2-way ANOVA, age:  $p=0.6422$ , interaction:  $p=0.9998$ ).

Figure 4 shows the rates of H<sub>2</sub>O<sub>2</sub> generation from the eleven sites grouped according to their operating redox potentials. Sites A<sub>F</sub>, B<sub>F</sub>, P<sub>F</sub> and O<sub>F</sub> in the matrix dehydrogenases of 2-oxoadipate, branched chain amino acids, pyruvate and 2-oxoglutarate, respectively, belong to the NADH/NAD<sup>+</sup> isopotential pool, together with site I<sub>F</sub> in complex I (Figure 4 A-E). The electrons from NADH, generated by these dehydrogenases, are transferred via site I<sub>F</sub> to site I<sub>Q</sub> in complex I (Figure 1F), and then to the next isopotential group, at the redox potential of QH<sub>2</sub>/Q (Figure 4 G-K). In this isopotential group are sites G<sub>Q</sub>, D<sub>Q</sub>, E<sub>F</sub>, II<sub>F</sub>, which reduce ubiquinone (Q) to ubiquinol (QH<sub>2</sub>), and the site in complex III (site III<sub>Q<sub>o</sub></sub>) that oxidizes the ubiquinol and ultimately transfers the electrons to cytochrome *c*, complex IV and O<sub>2</sub>.

Strikingly, the rate of superoxide/H<sub>2</sub>O<sub>2</sub> production was not increased in tazkd mice at any time point analyzed compared to the matched wildtype controls (2-way ANOVA was used to identify significant associations with age and genotype for each site). Instead, there was a trend in the opposite direction, and the rate of H<sub>2</sub>O<sub>2</sub> production

from sites  $O_F$  and  $III_{Q_0}$  were actually lower in tazkd compared to wildtype control mice at 7 months of age (Figure 4 E and K) (site  $O_F$   $2423 \pm 219$  vs  $1491 \pm 195$ ; site  $III_{Q_0}$   $6680 \pm 1735$  vs  $2390 \pm 172.5$ , mean  $\pm$  SEM pmol  $H_2O_2 \cdot \text{min}^{-1} \cdot \text{mg protein}^{-1}$ ;  $n = 3$ ).

**Skeletal muscle mitochondria** – The rate of superoxide/ $H_2O_2$  production from the eleven distinct sites were also measured in mitochondria isolated from skeletal muscle of wildtype and tazkd mice at 7 and 12 months of age (Figure 5) using the same approach described above. The sites with the highest maximum capacities were: site  $III_{Q_0}$ , site  $I_Q$ , site  $II_F$  and site  $O_F$  (in the 2-oxoglutarate dehydrogenase complex) (Figure 5). The rate of  $H_2O_2$  production from site  $III_{Q_0}$  was higher in wildtype and tazkd mice at 7 months of age (2-way ANOVA  $p < 0.001$ , Sidak's post-test). In tazkd mice,  $H_2O_2$  production from site  $G_Q$ , in glycerol phosphate dehydrogenase (GPDH), was the only site to be significantly higher when compared to the wildtype littermates ( $1215 \pm 34$ ,  $n=3$  vs  $1802 \pm 100$ ,  $n=3$ ,  $p=0.0011$ ; 2-way ANOVA, Sidak's post-test followed by Bonferroni correction for testing multiple sites).

The assessment of  $H_2O_2$  production rate at maximum capacity fundamentally measures the  $V_{\text{max}}$  of electron leak to  $O_2$  and is broadly used to report mitochondrial oxidant production. The advantages of assessing  $H_2O_2$  production at maximum capacity are discussed elsewhere (13). However, these measurements are non-physiological, as conventional substrates are presented in excess together with respiratory chain inhibitors. Under native conditions (i.e. in the absence of inhibitors) the rate of  $H_2O_2$  generation is much lower (14, 22, 26), therefore maximum capacities cannot be used to predict the actual rate of  $H_2O_2$  generation in intact cells or *in vivo*.

### **Ex vivo rates of mitochondrial $H_2O_2$ production at “rest”**

In intact cells and tissues multiple substrates are oxidized simultaneously and various sites generate superoxide/ $H_2O_2$  simultaneously and at different rates (26, 46). The rate of  $H_2O_2$  production *in vivo* is tissue-specific and depends on many factors,

including the substrates being preferentially oxidized and the abundance of the protein complex that contains the site from which the electrons leak to oxygen generating superoxide and then  $H_2O_2$ . For example, the rate of superoxide/ $H_2O_2$  production from site  $G_Q$  in 7-month old mice is ~5-fold higher in mitochondria from skeletal muscle than in those from heart (Figure 4G and 5I), which is correlated to the level of GPDH in these tissues (20). To approach physiology and assess the rate of superoxide/ $H_2O_2$  in isolated mitochondria under more realistic conditions, we carefully designed media that mimicked the cytosol of skeletal muscle at rest (not contracting) (26) and heart at rest (contracting but not under unusual load). These media contained all the relevant substrates and effectors considered relevant to mitochondrial electron transport and superoxide/ $H_2O_2$  production at the physiological concentration found in the cytosol of heart and skeletal muscle at “rest” [see supplementary table 1 and (26)]. We refer to the rates of superoxide/ $H_2O_2$  obtained in these media as “native” “*ex vivo*” rates. In Figure 6 we used these experimental systems to determine the rates of mitochondrial superoxide/ $H_2O_2$  production in conditions mimicking cardiac and skeletal muscle at rest.

The rest state in our system was defined by a low rate of ATP synthesis, which was achieved by the addition of oligomycin. Although not ideal, oligomycin is necessary due to the contaminating ATPases present in the mitochondrial preparation.

Mitochondria isolated from heart and skeletal muscle from 12-month old mice were incubated in their respective media. Strikingly, the “*ex vivo*” rates of superoxide/ $H_2O_2$  production by mitochondria from wildtype and tazkd mice were indistinguishable when using mitochondria from heart (Figure 6A) or from skeletal muscle (Figure 6B).

Taken together, we detected no difference in the rates of superoxide/ $H_2O_2$  production from most sites in heart or skeletal muscle mitochondria isolated from tazkd mice compared to wildtype controls. The only exception was the capacity of site  $G_Q$ , which was significantly increased in the

skeletal muscle from tazkd mice at 7 months of age (Figure 5I).

## Discussion

In any intact system, whether cells or tissues *in vivo*, the rate of mitochondrial oxidant species production is the sum of superoxide/H<sub>2</sub>O<sub>2</sub> production from up to eleven sites (Figure 1). Mitochondrial oxidants play an important role in the development of many pathological states. In BTHS, excess mitochondrial oxidants are thought to have a causative role in the development of the cardioskeletal myopathy. However, these molecules are also important for normal cell signaling and physiology (45), which may explain why supplementation with broad and unselective antioxidants to prevent BTHS cardioskeletal myopathy failed (11). In addition, such non-specific antioxidants may not target the appropriate oxidant species in the right cellular compartment. Still, a major gap in the field is the ability to identify and selectively target the site or sites from which the excess superoxide/H<sub>2</sub>O<sub>2</sub> arises while at the same time preserving physiological oxidant production from other sites. We hypothesized that in tazkd mice, mitochondrial superoxide/H<sub>2</sub>O<sub>2</sub> production is non-homogeneous and specific sites (perhaps those in the respiratory chain complexes directly affected by cardiolipin) may generate mitochondrial oxidants at abnormally high rates. The excess superoxide/H<sub>2</sub>O<sub>2</sub> production could be then normalized using a new generation of suppressors of mitochondrial electron leak at sites I<sub>Q</sub> and III<sub>Q<sub>o</sub></sub>, S1QELs and S3QELs (47, 48).

The present study set out i) to identify which site(s) have increased capacity to generate excess superoxide/H<sub>2</sub>O<sub>2</sub> in heart and skeletal muscle of tazkd mice and ii) to measure the physiologically-relevant rates of superoxide/H<sub>2</sub>O<sub>2</sub> production from these sites “*ex vivo*” using complex media mimicking cardiac and skeletal muscle cytosol at rest. Strikingly, we found that the overall maximum capacities of superoxide/H<sub>2</sub>O<sub>2</sub> generation in mitochondria isolated from cardiac and skeletal muscle were not different between the genotypes. Site G<sub>Q</sub> was the only exception and had a higher capacity in tazkd mice than controls at 7

months of age. In the more physiological approach we found that there was no difference in the “*ex vivo*” rates of superoxide/H<sub>2</sub>O<sub>2</sub> production in mitochondria from heart and skeletal muscle between tazkd mice and their littermate wildtype controls.

Mitochondrial ATP supply is crucial to satisfy the high energetic demand of cardiac and skeletal muscle. Therefore, it is not surprising that altered cardiolipin composition in BTHS results in cardioskeletal myopathy. Loss of cardiolipin alters mitochondrial morphology (49) and causes the destabilization of the components of the oxidative phosphorylation (38, 39, 50). Tafazzin deficiency in BTHS has been overwhelmingly reported to be associated with increased production of mitochondrial oxidants (7, 12, 27–35). Indeed, targeting mitochondrial oxidants with mitoTempo and linoleic acid ameliorated myocardial dysfunction in models of BTHS (12, 35), suggesting that mitochondrial oxidants have a causative role in BTHS pathogenesis.

The reliable measurement of mitochondrial superoxide/H<sub>2</sub>O<sub>2</sub> levels and production rates in tissues *in vivo* and intact cells is very challenging due to the lack of specific probes. For example, dichlorodihydrofluorescein (DCFH<sub>2</sub>), which has been widely used to report differences in oxidant production in BTHS (31, 32, 34, 49), does not directly react with H<sub>2</sub>O<sub>2</sub> (51). Importantly, H<sub>2</sub>O<sub>2</sub>-mediated DCFH<sub>2</sub> oxidation is dependent on iron uptake (52) and loss of cardiolipin increases levels of iron uptake genes (53). Importantly, DCFH<sub>2</sub> itself can generate superoxide in the presence of oxygen (51). MitoSOX has also been widely used to measure levels of mitochondrial superoxide in intact cells and has been used to report mitochondrial oxidants in different BTHS models (7, 12, 29, 34, 35). However, the results obtained with mitoSOX should be interpreted with caution (51). MitoSOX red fluorescence can be the result of unspecific oxidation in the presence of iron and therefore does not solely or even dominantly reflect superoxide levels. Also, its accumulation in the mitochondria is dependent on both mitochondrial and plasma membrane potentials and it is advised for the signal to be normalized to correct for this effect. Lastly, depending on the concentrations, mitoSOX disturbs the respiratory

chain, which will impact superoxide generation (54). Taken together, the interpretation of data obtained using these probes should be reevaluated. Finally, the other probe commonly used to report H<sub>2</sub>O<sub>2</sub> in isolated mitochondria in BTHS is Amplex ultraRed (27, 30, 33, 40). Although one should be aware that this probe can also provide some unspecific signal depending on the source of mitochondria (51, 55), Amplex ultraRed is more specific for H<sub>2</sub>O<sub>2</sub> and is more reliable than its predecessor, Amplex Red (56). Interestingly, the published data using Amplex ultraRed is more heterogeneous as some studies show a higher rate of H<sub>2</sub>O<sub>2</sub> generation in the context of tazkd (30, 33) while others report no difference (33, 40).

In the present work we provide a comprehensive assessment of the rate of superoxide/H<sub>2</sub>O<sub>2</sub> generation from each individual site in heart and skeletal muscle mitochondria during the progression BTHS in tazkd mice. Unexpectedly, we found no major differences in the maximum capacities of the different sites (Figures 4 and 5) despite a clear phenotype of reduced oxidative capacity (Figure 2 and Supplementary Figure 1). This unexpected lack of association between mitochondrial superoxide/H<sub>2</sub>O<sub>2</sub> production and the cardioskeletal myopathology in tazkd mice was also observed in MCAT-tazkd mice (33). In that study, tazkd mice were crossed with a mouse line expressing the H<sub>2</sub>O<sub>2</sub>-degrading enzyme catalase (CAT) targeted specifically to the mitochondrial matrix. In these MCAT-tazkd mice, mitochondrial matrix H<sub>2</sub>O<sub>2</sub> levels in the heart were lower but this was insufficient to improve the cardioskeletal myopathologies (33). Similarly, it was recently reported that the mitochondrial-targeted antioxidant mitoQ and the general antioxidant n-acetylcysteine did not improve cardiopathologies in tazkd mice<sup>1</sup>.

To overcome the drawbacks of trying to measure levels and rates of production of mitochondrial oxidants in intact cells with DCFH<sub>2</sub> and mitoSOX and to be able to approach physiology using isolated mitochondria, we designed “*ex vivo*” media that mimicked the cytosol of heart and skeletal muscle at rest (Figure 6, Supplementary Table 1). This approach was previously validated in three different media designed to mimic the cytosol of skeletal muscle at rest and during mild

and intense exercise (26). The rate of superoxide/H<sub>2</sub>O<sub>2</sub> generation was higher at “rest” than in conditions mimicking exercise. At “rest” sites I<sub>Q</sub> and II<sub>F</sub> accounted for half of the total measured rate of superoxide/H<sub>2</sub>O<sub>2</sub> production. Interestingly, the contribution of site III<sub>Q<sub>o</sub></sub>, which has a high capacity for generating superoxide/H<sub>2</sub>O<sub>2</sub>, was similar to the low capacity site I<sub>F</sub> (26). The contributions of sites I<sub>Q</sub> and III<sub>Q<sub>o</sub></sub> were further confirmed in C2C12 myoblasts using S1QELs and S3QELs (57). From these results we concluded that the mitochondrial rate of superoxide/H<sub>2</sub>O<sub>2</sub> production measured at maximum capacity (where individual substrates are present in excess in the presence of inhibitors) should not be used to predict the rates in tissues *in vivo*.

Although the more complex “*ex vivo*” approach offers notable advantages, because it uses all the relevant metabolites and effectors at the physiological concentrations found in the cytosol of cardiac and skeletal muscle cells (Supplementary Table 1), it is still not perfect. The media design for these experiments were based on the levels of metabolites and effectors found in the cytosol of rat skeletal muscle at rest and cardiac muscle cells in beating hearts not under load [Supplementary Table 1 and (26)] and may not be a simulacrum of the metabolites in the mouse tissues, particularly since oligomycin was used to inhibit the mitochondrial ATP synthase and prevent high recycling of ATP produced by contaminating ATPases. In addition, and perhaps critically, the concentrations of these metabolites are unknown in tazkd cardiac and skeletal cells, so they were assumed to be similar between wildtype and tazkd mice.

Finally, the doxycycline diet, necessary to induce the short-hairpin RNA against taz, promoted weight gain in wildtype mice (Figure 1 and Supplementary Figure 1) (6, 30). In our facility, 8 months old wildtype mice weighed as much as genetically obese, *ob/ob*, mice (41). Obesity is associated with altered glucose homeostasis and insulin resistance, which has been previously reported in tazkd wildtype littermate mice on the doxycycline diet (30). Mitochondrial generation of superoxide/H<sub>2</sub>O<sub>2</sub> is higher in the heart and skeletal muscle of different models of obesity (58, 59).



Therefore, from 8-12 months of age, we cannot rule out the possibility that increased mitochondrial oxidant production in the heart and skeletal muscle in the tazkd could be masked by an independent effect of obesity and associated changes on mitochondrial oxidant production in the wildtype controls. It is important to note, however, that at 3-months of age, there was no difference in body weight between genotypes and therefore, the potential confounding effect of body weight was absent. Under these conditions, we still failed to detect any differences in the capacity of superoxide/H<sub>2</sub>O<sub>2</sub> production between wildtype and tazkd (Figure 4).

## Conclusion

We used a systematic approach to determine the maximum capacities and physiologically relevant rates of mitochondrial superoxide/H<sub>2</sub>O<sub>2</sub> production from all known sites associated with substrate oxidation in mitochondria isolated from tazkd mice and their wildtype littermates. Our results strongly support the nascent idea that cardioskeletal myopathy in tazkd is not associated with increased production of mitochondrial oxidants. Future studies using other models of BTHS, such as the tafazzin knockout mice, will be important to elucidate the relationship between mitochondrial oxidant generation and BTHS cardioskeletal pathologies.

## Experimental Procedures

### *Animals, Mitochondria and Reagents*

All animal procedures presented here were approved by Institutional Animal Care and Use Committee (IACUC) of Harvard University. Mice were kept on 12-hour light/12-hour dark cycle in the Harvard T.H. Chan School of Public Health pathogen-free barrier facility. Tafazzin knockdown male mice were obtained from Jackson laboratory (B6.Cg-*Gt(ROSA)26Sor<sup>tm37(H1)tetO-RN*Ai*:Taz</sup>/ZkhuJ*, stock #014648) and crossed with C57BL/6NJ females. Pregnant females were provided with 625 mg/kg doxycycline-containing chow (C13510i, Research Diets) to induce tafazzin silencing in the pups during early development. After weaning,

wildtype and heterozygous male mice were kept on doxycycline chow for the remainder of the study. All mice were checked to be negative for nicotinamide nucleotide transhydrogenase (nnt). Skeletal muscle mitochondria from 1-2 wildtype and tazkd mice were isolated from hind limb at 4°C in Chappell-Perry buffer [CP1- 0.1 M KCl, 50 mM Tris, 2 mM EGTA, pH 7.4 and CP2- CP1 supplemented with 0.5 % w/v fatty acid-free bovine serum albumin, 2 mM MgCl<sub>2</sub>, 1 mM ATP and 250 U•0.1ml<sup>-1</sup> subtilisin protease type VIII, pH 7.4] as described by (60). Heart mitochondria were isolated from 1-2 wildtype and Tazkd mice. Mice were euthanized by cervical dislocation and the heart was immediately excised, excess blood was removed, and the heart was placed in ice-cold buffer B [0.25 M sucrose, 10 mM HEPES (pH 7.2) and 5 mM EGTA]. After few seconds to allow the remaining blood to decant, the heart was rapidly diced into very small pieces and the suspension was poured into a 30 mL ice-jacket Potter-Elvehjem with motorized Teflon pestle and 10-15 mL buffer A [buffer B supplemented with 0.5 % w/v fatty acid-free bovine serum albumin] was added. After 6-10 strokes the homogenate was transferred to an ice-cold 50 mL centrifuge tube and spun at 500 x g for 5 min. The supernatant was transferred to a clean tube and spun at 10,000 x g for 10 min. Now, the supernatant was discarded, and the pellet was carefully resuspended in 0.5 mL buffer B. and then 20 mL buffer B was added followed by a quick centrifugation at 1000 x g for 3 min. The supernatant was transferred to a fresh tube and centrifuged at 10,000 x g for 10 min. The pellet was resuspended in 200 µL of buffer B and protein concentration was determined using bicinchoninic acid assay.

### *Western Blot Analysis*

To determine tafazzin levels, 10 µg samples of skeletal muscle and heart isolated mitochondrial protein were boiled in Laemmli loading buffer under reducing conditions. Proteins were separated by 4 –12% NU-PAGE gradient gel using 1x MOPS buffer (Invitrogen) and transferred to a nitrocellulose membrane. Anti-tafazzin (1:1000 dilution) was a kind gift from Dr. S.M. Claypool (61) and recognizes a band just below 30kDa.

Chemiluminescence was generated with SuperSignal West Pico (Thermo Scientific) and quantified with Image J software (National Institutes of Health).

### *Mitochondrial Oxygen Consumption and Superoxide/H<sub>2</sub>O<sub>2</sub> Production*

Oxygen consumption rate (OCR) of freshly isolated heart and skeletal muscle mitochondria was monitored using an XF-24 extracellular flux analyzer (Seahorse Bioscience, Agilent). Briefly, 2  $\mu\text{g}$  of mitochondrial protein was plated per well in KHE medium (120 mM KCl, 5 mM HEPES, 1 mM EGTA) supplemented with 0.3% w/v fatty acid-free bovine serum albumin, 1 mM MgCl<sub>2</sub>, 5 mM KH<sub>2</sub>PO<sub>4</sub>. Baseline rates with 1 mM ADP were measured for 15 min and 5 mM succinate + 4  $\mu\text{M}$  rotenone were injected from port A. OCR at state 3 was monitored for 9 min and 1  $\mu\text{g}\cdot\text{ml}^{-1}$  oligomycin was injected from port B to induce mitochondrial state 4.

Rates of superoxide/H<sub>2</sub>O<sub>2</sub> production were collectively measured as rates of H<sub>2</sub>O<sub>2</sub> generation, as two superoxide molecules are dismutated by mitochondrial or exogenous superoxide dismutase to yield one H<sub>2</sub>O<sub>2</sub>. The maximum capacities for superoxide/H<sub>2</sub>O<sub>2</sub> production from the eleven sites were detected fluorometrically in a 96-well plate using specific combinations of inhibitors and substrates (see below) in the presence of 5 U $\cdot\text{ml}^{-1}$  horseradish peroxidase, 25 U $\cdot\text{ml}^{-1}$  superoxide dismutase and 50  $\mu\text{M}$  Amplex UltraRed (56). Heart and skeletal muscle mitochondria (0.1 mg protein $\cdot\text{ml}^{-1}$ ) were incubated in KHE medium supplemented with 0.3% w/v fatty acid-free bovine serum albumin, 1 mM MgCl<sub>2</sub>, 5 mM KH<sub>2</sub>PO<sub>4</sub>, 1  $\mu\text{g}\cdot\text{ml}^{-1}$  oligomycin. Changes in fluorescence signal (Ex 604/Em 640) were monitored for 15 min. using a microplate reader (Molecular Devices SpectraMax Paradigm) and calibrated with known amounts of H<sub>2</sub>O<sub>2</sub> at the end of each run in the presence of all inhibitors and effectors (56). The sites linked to the NADH/NAD<sup>+</sup> isopotential pool were measured in the presence of 4  $\mu\text{M}$  rotenone: Site I<sub>F</sub>: 5 mM malate, 2.5 mM ATP and 5 mM aspartate; site A<sub>F</sub>: 10 mM 2-oxoadipic acid; B<sub>F</sub>: 20 mM KMV (3-methyl-2-oxopentanoate/alpha-keto-

methylvalerate); P<sub>F</sub>: 2.5 mM pyruvate and 5 mM carnitine; O<sub>F</sub>: 2.5 mM 2-oxoglutarate and 2.5 mM ADP. Site I<sub>Q</sub> was measured as the rotenone-sensitive rate in the presence of 5 mM succinate. The remaining sites were linked to the ubiquinone isopotential pool: Site III<sub>Q<sub>0</sub></sub> was measured as the myxothiazol-sensitive rate in the presence of 5 mM succinate, 5 mM malonate, 4  $\mu\text{M}$  rotenone and 2  $\mu\text{M}$  antimycin A. Site II<sub>F</sub> was measured as the 1mM malonate-sensitive rate in the presence of 0.2 mM succinate and 2  $\mu\text{M}$  myxothiazol. Site G<sub>Q</sub>: 10 mM glycerol-3-phosphate, 4  $\mu\text{M}$  rotenone, 2  $\mu\text{M}$  myxothiazol, 2  $\mu\text{M}$  antimycin A and 1 mM malonate; Site D<sub>Q</sub>: 3.5 mM dihydroorotate, 4  $\mu\text{M}$  rotenone, 2  $\mu\text{M}$  myxothiazol, 2  $\mu\text{M}$  antimycin A and 1 mM malonate; Site E<sub>F</sub>: 15  $\mu\text{M}$  palmitoylcarnitine, 2 mM carnitine, 5  $\mu\text{M}$  FCCP, 1 mM malonate, 2  $\mu\text{M}$  myxothiazol.

For the measurement of the rate of H<sub>2</sub>O<sub>2</sub> production under native conditions *ex vivo*, skeletal muscle and heart mitochondria (0.1 mg of protein $\cdot\text{ml}^{-1}$ ) from 12 month-old wildtype and tazkd mice were incubated at 37 °C for 4 –5 min in the appropriate “basic medium” mimicking the cytosol of skeletal muscle or heart during rest, respectively, (basic “rest” medium plus 1  $\mu\text{g}\cdot\text{ml}^{-1}$  oligomycin) and then added to a black 96 well plate containing the complex substrate mix. Changes in fluorescence signal (Ex 604/Em 640) were monitored for 15 min. using a microplate reader (Molecular Devices SpectraMax Paradigm) and calibrated with known amounts of H<sub>2</sub>O<sub>2</sub> at the end of each run in the presence of all substrates.

*Skeletal muscle basic medium* – 40 mM taurine, 3 mM KH<sub>2</sub>PO<sub>4</sub>, 3.16 mM NaCl, 52.85 mM KCl, 5.46 mM MgCl<sub>2</sub> (targeted free Mg<sup>2+</sup> concentration 600  $\mu\text{M}$ ), 0.214 mM CaCl<sub>2</sub> (targeted Ca<sup>2+</sup> concentration 0.05  $\mu\text{M}$ ), 10 mM HEPES, 1 mM EGTA, 0.3 % w/v fatty acid-free bovine serum albumin, 1  $\mu\text{g}\cdot\text{ml}^{-1}$  oligomycin, pH 7.1. Targeted Na<sup>+</sup> concentration was 16 mM and total K<sup>+</sup> concentration was 80 mM. The medium had K<sup>+</sup> and Cl<sup>-</sup> adjusted to give an osmolarity of 290 mosM. Total Mg<sup>2+</sup> and Ca<sup>2+</sup> concentrations to give the targeted free values were calculated using the software MaxChelator (26).

*Skeletal muscle complex substrate mix* – 100  $\mu$ M acetoacetate, 300  $\mu$ M 3-hydroxybutyrate, 2500  $\mu$ M alanine, 500  $\mu$ M arginine, 1500  $\mu$ M aspartate, 1500  $\mu$ M glutamate, 6000  $\mu$ M glutamine, 7000  $\mu$ M glycine, 150  $\mu$ M isoleucine, 200  $\mu$ M leucine, 1250  $\mu$ M lysine, 2000  $\mu$ M serine, 300  $\mu$ M valine, 100  $\mu$ M citrate, 200  $\mu$ M malate, 30  $\mu$ M 2-oxoglutarate, 100  $\mu$ M pyruvate, 200  $\mu$ M succinate, 100  $\mu$ M glycerol-3-phosphate, 50  $\mu$ M dihydroxyacetone phosphate, 1000  $\mu$ M carnitine, 500  $\mu$ M acetylcarnitine, 10  $\mu$ M palmitoylcarnitine and 6000  $\mu$ M ATP (26).

*Heart basic medium* – 70 mM taurine, 6 mM  $\text{KH}_2\text{PO}_4$ , 6 mM NaCl, 12.8 mM KCl, 9.2 mM  $\text{MgCl}_2$  (targeted free  $\text{Mg}^{2+}$  concentration 1200  $\mu$ M), 0.42 mM  $\text{CaCl}_2$  (targeted  $\text{Ca}^{2+}$  concentration 0.1  $\mu$ M), 10 mM HEPES, 1 mM EGTA, 0.3 % w/v fatty acid-free bovine serum albumin, 1  $\mu\text{g}\cdot\text{ml}^{-1}$  oligomycin, pH 7.1. Targeted  $\text{Na}^+$  concentration was 18 mM and total  $\text{K}^+$  concentration was 55.5 mM. The medium had  $\text{K}^+$  and  $\text{Cl}^-$  adjusted to give an osmolarity of 284 mosM. Total  $\text{Mg}^{2+}$  and  $\text{Ca}^{2+}$  concentrations to give the targeted free values were calculated using the software MaxChelator.

*Heart complex substrate mix* – 50  $\mu$ M 3-hydroxybutyrate, 2000  $\mu$ M alanine, 400  $\mu$ M arginine, 4500  $\mu$ M aspartate, 5000  $\mu$ M glutamate, 8000  $\mu$ M glutamine, 1000  $\mu$ M glycine, 80  $\mu$ M isoleucine, 130  $\mu$ M leucine, 800  $\mu$ M lysine, 350  $\mu$ M Proline, 1000  $\mu$ M serine, 150  $\mu$ M valine, 100  $\mu$ M citrate, 150  $\mu$ M malate, 50  $\mu$ M 2-oxoglutarate, 130  $\mu$ M pyruvate, 135  $\mu$ M succinate, 400  $\mu$ M glycerol-3-phosphate, 40  $\mu$ M dihydroxyacetone phosphate, 1700  $\mu$ M carnitine, 80  $\mu$ M acetylcarnitine, 5  $\mu$ M palmitoylcarnitine and 9000  $\mu$ M ATP.

#### *Isolation and quantification of cardiolipin (CL) and monolysocardiolipin (MLCL)*

Lipids were extracted from isolated heart and skeletal muscle mitochondria using methanol chloroform (2:1). Isolation and quantification of cardiolipin and monolysocardiolipin were performed according to (62).

#### *Body composition, Comprehensive Lab Animal Monitoring System (CLAMS) and exercise challenge*

Body composition from wildtype and Tazkd mice at 3 and 6 months of age was measured with dual-energy x-ray absorptiometry (DEXA Lunar PIXImus, GE). Animals were anesthetised with 100 mg/kg ketamine and 10 mg/kg xylazine. For CLAMS, mice were housed individually and acclimatized for 1 day. Oxygen consumption, carbon dioxide release, energy expenditure and activity were measured using a Columbus Instruments Oxymax-CLAMS system according to guidelines for measuring energy metabolism in mice (63, 64).

Mice were physically challenged on a lidded motorized treadmill (Columbus Instrument, Columbus, OH, USA), which had adjustable speed and inclination and electric shock stimulation grid. The stimulus intensity was set to 1 mA. Mice were acclimatized in the treadmill for 3 d before the test. Acclimation protocol: 5 m/min for 5 min, followed by 1 m/min increment in speed every min until 10 min. Mice were allowed to rest for 5 min and then run for 10 min at 10m/min. On the test day, wildtype and tazkd mice were placed in the treadmill and the test started with the mice running for 5 min at 5m/min, then the speed was increased 1 m/min every min up to 20 min. Exhaustion was achieved when a mouse stayed more than 10 s on the stimulus grid or touched the grid more than ten consecutive times.

#### *Statistics*

Data are presented as mean  $\pm$  SEM of n independent values. Student's t-test was used to calculate statistical significance when two groups were compared (Figures 2, 3 and 6). For multiple comparison tests where age, genotype and sites of superoxide/hydrogen peroxide production were analyzed, 2-way ANOVA followed by Sidark's post-hoc test was used and when appropriate Bonferroni correction was applied.  $P < 0.05$  was considered statistically significant (GraphPad Prism).

#### *Data availability*

All the data presented here is contained in this manuscript.

## **Acknowledgments**

The authors thank members of the Hotamisligil laboratory, especially Dr. Karen Inouye for her valuable help in the mice facility. We are grateful to Dr. Steven Claypool for kindly providing an aliquot of anti-tafazzin antibody, and Michael MacArthur for assisting on the treadmill experiments.

## **Funding**

R.L.S.G. was supported by the Barth Syndrome Foundation (Idea Grant) and by the Sabri Ülker Center; A.B. was supported by a Deutsche Forschungsgemeinschaft Research Fellowship (BA 4925/1-1) and a Deutsches Zentrum für Herz-Kreislauf-Forschung Junior Research Group Grant; G.S.H. lab was supported by grants from The Juvenile Diabetes Research Foundation and the National Institutes of Health, USA; M.S. was supported by the National Institutes of Health grant (R01 GM115593).

**Conflict of Interest:** The authors declare no conflicts of interest.

**Footnotes:** <sup>1</sup> Colin Phoon et al., communication at the Barth Syndrome Foundation Conference in July 2018, Florida.

## References

1. Horvath, S. E., and Daum, G. (2013) Lipids of mitochondria. *Prog. Lipid Res.* **52**, 590–614
2. Schlame, M., Rua, D., and Greenberg, M. L. (2000) The biosynthesis and functional role of cardiolipin. *Prog. Lipid Res.* **39**, 257–288
3. Saric, A., Andreau, K., Armand, A. S., Møller, I. M., and Petit, P. X. (2016) Barth syndrome: From mitochondrial dysfunctions associated with aberrant production of reactive oxygen species to pluripotent stem cell studies. *Front. Genet.* **6**, 359
4. Schlame, M., Ren, M., Xu, Y., Greenberg, M. L., and Haller, I. (2005) Molecular symmetry in mitochondrial cardiolipins. *Chem. Phys. Lipids.* **138**, 38–49
5. Xu, Y., Malhotra, A., Ren, M., and Schlame, M. (2006) The enzymatic function of tafazzin. *J. Biol. Chem.* **281**, 39217–39224
6. Acehan, D., Vaz, F., Houtkooper, R. H., James, J., Moore, V., Tokunaga, C., Kulik, W., Wansapura, J., Toth, M. J., Strauss, A., and Khuchua, Z. (2011) Cardiac and skeletal muscle defects in a mouse model of human Barth syndrome. *J. Biol. Chem.* **286**, 899–908
7. Lou, W., Reynolds, C. A., Li, Y., Liu, J., Hüttemann, M., Schlame, M., Stevenson, D., Strathdee, D., and Greenberg, M. L. (2018) Loss of tafazzin results in decreased myoblast differentiation in C2C12 cells: A myoblast model of Barth syndrome and cardiolipin deficiency. *Biochim. Biophys. Acta - Mol. Cell Biol. Lipids.* **1863**, 857–865
8. Barth, P. G., Scholte, H. R., Berden, J. A., Van Der Klei-Van Moorsel, J. M., Luyt-Houwen, I. E. M., Van'T Veer-Korthof, E. T., Van Der Harten, J. J., and Sobotka-Plojhar, M. A. (1983) An X-linked mitochondrial disease affecting cardiac muscle, skeletal muscle and neutrophil leucocytes. *J. Neurol. Sci.* **62**, 327–355
9. Dudek, J., and Maack, C. (2017) Barth syndrome cardiomyopathy. *Cardiovasc. Res.* **113**, 399–410
10. Soustek, M. S., Falk, D. J., Mah, C. S., Toth, M. J., Schlame, M., Lewin, A. S., and Byrne, B. J. (2011) Characterization of a transgenic short hairpin RNA-induced murine model of tafazzin deficiency. *Hum. Gene Ther.* **22**, 865–871
11. Ren, M., Miller, P. C., Schlame, M., and Phoon, C. K. L. (2019) A critical appraisal of the tafazzin knockdown mouse model of Barth syndrome: What have we learned about pathogenesis and potential treatments? in *American Journal of Physiology - Heart and Circulatory Physiology*, 10.1152/ajpheart.00504.2019
12. Wang, G., McCain, M. L., Yang, L., He, A., Pasqualini, F. S., Agarwal, A., Yuan, H., Jiang, D., Zhang, D., Zangi, L., Geva, J., Roberts, A. E., Ma, Q., Ding, J., Chen, J., Wang, D.-Z., Li, K., Wang, J., Wanders, R. J. A., Kulik, W., Vaz, F. M., Laflamme, M. A., Murry, C. E., Chien, K. R., Kelley, R. I., Church, G. M., Parker, K. K., and Pu, W. T. (2014) Modeling the mitochondrial cardiomyopathy of Barth syndrome with induced pluripotent stem cell and heart-on-chip technologies. *Nat. Med.* **20**, 616–23
13. Brand, M. D. (2016) Mitochondrial generation of superoxide and hydrogen peroxide as the source of mitochondrial redox signaling. *Free Radic. Biol. Med.* **100**, 14–31
14. Quinlan, C. L., Treberg, J. R., Perevoshchikova, I. V., Orr, A. L., and Brand, M. D. (2012) Native rates of superoxide production from multiple sites in isolated mitochondria measured using endogenous reporters. *Free Radic. Biol. Med.* **53**, 1807–1817
15. Quinlan, C. L., Goncalves, R. L. S., Hey-Mogensen, M., Yadava, N., Bunik, V. I., and Brand, M. D. (2014) The 2-oxoacid dehydrogenase complexes in mitochondria can produce superoxide/hydrogen peroxide at much higher rates than complex I. *J. Biol. Chem.* **289**, 8312–8325

16. Goncalves, R. L. S., Bunik, V. I., and Brand, M. D. (2016) Production of superoxide/hydrogen peroxide by the mitochondrial 2-oxoadipate dehydrogenase complex. *Free Radic. Biol. Med.* **91**, 247–255
17. Perevoshchikova, I. V., Quinlan, C. L., Orr, A. L., Gerencser, A. A., and Brand, M. D. (2013) Sites of superoxide and hydrogen peroxide production during fatty acid oxidation in rat skeletal muscle mitochondria. *Free Radic. Biol. Med.* **61**, 298–309
18. Hey-Mogensen, M., Goncalves, R. L. S., Orr, A. L., and Brand, M. D. (2014) Production of superoxide/H<sub>2</sub>O<sub>2</sub> by dihydroorotate dehydrogenase in rat skeletal muscle mitochondria. *Free Radic. Biol. Med.* **72**, 149–155
19. Quinlan, C. L., Orr, A. L., Perevoshchikova, I. V., Treberg, J. R., Ackrell, B. A., and Brand, M. D. (2012) Mitochondrial complex II can generate reactive oxygen species at high rates in both the forward and reverse reactions. *J. Biol. Chem.* **287**, 27255–64
20. Orr, A. L., Quinlan, C. L., Perevoshchikova, I. V., and Brand, M. D. (2012) A refined analysis of superoxide production by mitochondrial sn-glycerol 3-phosphate dehydrogenase. *J. Biol. Chem.* **287**, 42921–42935
21. Quinlan, C. L., Gerencser, A. A., Treberg, J. R., and Brand, M. D. (2011) The mechanism of superoxide production by the antimycin-inhibited mitochondrial Q-cycle. *J. Biol. Chem.* **286**, 31361–31372
22. Quinlan, C. L., Perevoshchikova, I. V., Hey-Mogensen, M., Orr, A. L., and Brand, M. D. (2013) Sites of reactive oxygen species generation by mitochondria oxidizing different substrates. *Redox Biol.* **1**, 304–312
23. Arruda, A. P., Pers, B. M., Parlakgul, G., Güney, E., Goh, T., Cagampan, E., Lee, G. Y., Goncalves, R. L., and Hotamisligil, G. S. (2017) Defective STIM-mediated store operated Ca<sup>2+</sup> entry in hepatocytes leads to metabolic dysfunction in obesity. *Elife*. 10.7554/eLife.29968
24. Cieslar, J. H., and Dobson, G. P. (2000) Free [ADP] and aerobic muscle work follow at least second order kinetics in rat gastrocnemius in vivo. *J. Biol. Chem.* **275**, 6129–6134
25. Berchtold, M. W., Brinkmeier, H., and Müntener, M. (2000) Calcium ion in skeletal muscle: Its crucial role for muscle function, plasticity, and disease. *Physiol. Rev.* **80**, 1215–1265
26. Goncalves, R. L. S., Quinlan, C. L., Perevoshchikova, I. V., Hey-Mogensen, M., and Brand, M. D. (2015) Sites of superoxide and hydrogen peroxide production by muscle mitochondria assessed ex vivo under conditions mimicking rest and exercise. *J. Biol. Chem.* **290**, 209–227
27. Szczepanek, K., Allegood, J., Aluri, H., Hu, Y., Chen, Q., and Lesnefsky, E. J. (2016) Acquired deficiency of tafazzin in the adult heart: Impact on mitochondrial function and response to cardiac injury. *Biochim. Biophys. Acta - Mol. Cell Biol. Lipids*. 10.1016/j.bbalip.2015.12.004
28. Chen, S., He, Q., and Greenberg, M. L. (2008) Loss of tafazzin in yeast leads to increased oxidative stress during respiratory growth. *Mol. Microbiol.* **68**, 1061–1072
29. Chowdhury, A., Aich, A., Jain, G., Wozny, K., Lüchtenborg, C., Hartmann, M., Bernhard, O., Balleiniger, M., Alfar, E. A., Zieseniss, A., Toischer, K., Guan, K., Rizzoli, S. O., Brügger, B., Fischer, A., Katschinski, D. M., Rehling, P., and Dudek, J. (2018) Defective mitochondrial cardiolipin remodeling dampens HIF-1 $\alpha$  expression in hypoxia. *Cell Rep.* **25**, 561-570.e6
30. Cole, L. K., Mejia, E. M., Vandel, M., Sparagna, G. C., Claypool, S. M., Dyck-Chan, L., Klein, J., and Hatch, G. M. (2016) Impaired cardiolipin biosynthesis prevents hepatic steatosis and diet-induced obesity. *Diabetes*. **65**, 3289–3300
31. Dudek, J., Cheng, I. F., Balleiniger, M., Vaz, F. M., Streckfuss-Bömeke, K., Hübscher, D., Vukotic, M., Wanders, R. J. A., Rehling, P., and Guan, K. (2013) Cardiolipin deficiency affects

- respiratory chain function and organization in an induced pluripotent stem cell model of Barth syndrome. *Stem Cell Res.* **11**, 806–819
32. Dudek, J., Cheng, I., Chowdhury, A., Wozny, K., Balleininger, M., Reinhold, R., Grunau, S., Callegari, S., Toischer, K., Wanders, R. J., Hasenfuß, G., Brügger, B., Guan, K., and Rehling, P. (2016) Cardiac-specific succinate dehydrogenase deficiency in Barth syndrome. *EMBO Mol. Med.* **8**, 139–154
  33. Johnson, J. M., Ferrara, P. J., Verkerke, A. R. P., Coleman, C. B., Wentzler, E. J., Neuffer, P. D., Kew, K. A., de Castro Brás, L. E., and Funai, K. (2018) Targeted overexpression of catalase to mitochondria does not prevent cardioskeletal myopathy in Barth syndrome. *J. Mol. Cell. Cardiol.* **121**, 94–102
  34. He, Q., Wang, M., Harris, N., and Han, X. (2013) Tafazzin knockdown interrupts cell cycle progression in cultured neonatal ventricular fibroblasts. *Am. J. Physiol. - Hear. Circ. Physiol.* 10.1152/ajpheart.00084.2013
  35. He, Q., Harris, N., Ren, J., and Han, X. (2014) Mitochondria-targeted antioxidant prevents cardiac dysfunction induced by tafazzin gene knockdown in cardiac myocytes. *Oxid. Med. Cell. Longev.* 10.1155/2014/654198
  36. Powers, C., Huang, Y., Strauss, A., and Khuchua, Z. (2013) Diminished exercise capacity and mitochondrial *bc<sub>1</sub>* complex deficiency in tafazzin-knockdown mice. *Front. Physiol.* 10.3389/fphys.2013.00074
  37. Kiebish, M. A., Yang, K., Liu, X., Mancuso, D. J., Guan, S., Zhao, Z., Sims, H. F., Cerqua, R., Cade, W. T., Han, X., and Gross, R. W. (2013) Dysfunctional cardiac mitochondrial bioenergetic, lipidomic, and signaling in a murine model of Barth syndrome. *J. Lipid Res.* **54**, 1312–1325
  38. Huang, Y., Powers, C., Madala, S. K., Greis, K. D., Haffey, W. D., Towbin, J. A., Purevjav, E., Javadov, S., Strauss, A. W., and Khuchua, Z. (2015) Cardiac metabolic pathways affected in the mouse model of Barth syndrome. *PLoS One.* 10.1371/journal.pone.0128561
  39. Claypool, S. M., Oktay, Y., Boonthung, P., Loo, J. A., and Koehler, C. M. (2008) Cardiolipin defines the interactome of the major ADP/ATP carrier protein of the mitochondrial inner membrane. *J. Cell Biol.* **182**, 937–950
  40. Kim, J., Lee, K., Fujioka, H., Tandler, B., and Hoppel, C. L. (2018) Cardiac mitochondrial structure and function in tafazzin-knockdown mice. *Mitochondrion.* 10.1016/j.mito.2018.10.005
  41. Broderick, T. L., Wang, D., Jankowski, M., and Gutkowska, J. (2014) Unexpected effects of voluntary exercise training on natriuretic peptide and receptor mRNA expression in the ob/ob mouse heart. *Regul. Pept.* **188**, 52–59
  42. Soustek, M. S., Baligand, C., Falk, D. J., Walter, G. A., Lewin, A. S., and Byrne, B. J. (2015) Endurance training ameliorates complex 3 deficiency in a mouse model of Barth syndrome. *J. Inherit. Metab. Dis.* 10.1007/s10545-015-9834-8
  43. Kowaltowski, A. J., de Souza-Pinto, N. C., Castilho, R. F., and Vercesi, A. E. (2009) Mitochondria and reactive oxygen species. *Free Radic. Biol. Med.* **47**, 333–343
  44. Turrens, J. F. (2003) Mitochondrial formation of reactive oxygen species. *J. Physiol.* **552**, 335–344
  45. Finkel, T. (2012) Signal transduction by mitochondrial oxidants. *J. Biol. Chem.* **287**, 4434–4440
  46. Wong, H. S., Benoit, B., and Brand, M. D. (2019) Mitochondrial and cytosolic sources of hydrogen peroxide in resting C2C12 myoblasts. *Free Radic. Biol. Med.* **130**, 140–150
  47. Brand, M. D., Goncalves, R. L. S., Orr, A. L., Vargas, L., Gerencser, A. A., Borch Jensen, M.,

- Wang, Y. T., Melov, S., Turk, C. N., Matzen, J. T., Dardov, V. J., Petrassi, H. M., Meeusen, S. L., Perevoshchikova, I. V., Jasper, H., Brookes, P. S., and Ainscow, E. K. (2016) Suppressors of superoxide-H<sub>2</sub>O<sub>2</sub> production at site I<sub>Q</sub> of mitochondrial complex I protect against stem cell hyperplasia and ischemia-reperfusion injury. *Cell Metab.* **24**, 582–592
48. Orr, A. L., Vargas, L., Turk, C. N., Baaten, J., Matzen, J. T., Dardov, V., Attle, S. J., Li, J., Quackenbush, D. C., Goncalves, R. L. S., Perevoshchikova, I. V., Petrassi, H. M., Meeusen, S. L., Ainscow, E. K., and Brand, M. D. (2015) Suppressors of superoxide production from mitochondrial complex III. *Nat. Chem. Biol.* **11**, 834–839
49. Khuchua, Z., Vaz, F., Acehan, D., and Strauss, A. (2011) Mouse model of human Barth syndrome, mitochondrial cardiolipin disorder. *Mol. Genet. Metab.* **102**, 295
50. McKenzie, M., Lazarou, M., Thorburn, D. R., and Ryan, M. T. (2006) Mitochondrial respiratory chain supercomplexes are destabilized in barth syndrome patients. *J. Mol. Biol.* **361**, 462–469
51. Kalyanaraman, B., Hardy, M., Podsiadly, R., Cheng, G., and Zielonka, J. (2017) Recent developments in detection of superoxide radical anion and hydrogen peroxide: Opportunities, challenges, and implications in redox signaling. *Arch. Biochem. Biophys.* **617**, 38–47
52. Tampo, Y., Kotamraju, S., Chitambar, C. R., Kalivendi, S. V., Keszler, A., and Kalyanaraman, J. J. B. (2003) Oxidative stress-induced iron signaling is responsible for peroxide-dependent oxidation of dichlorodihydrofluorescein in endothelial cells role of transferrin receptor-dependent iron uptake in apoptosis. *Circ. Res.* **92**, 56–63
53. Patil, V. A., Fox, J. L., Gohil, V. M., Winge, D. R., and Greenberg, M. L. (2013) Loss of cardiolipin leads to perturbation of mitochondrial and cellular iron homeostasis. *J. Biol. Chem.* **288**, 1696–1705
54. Polster, B. M., Nicholls, D. G., Ge, S. X., and Roelofs, B. A. (2014) Use of potentiometric fluorophores in the measurement of mitochondrial reactive oxygen species. in *Methods in Enzymology*, pp. 225–250, Academic Press Inc., **547**, 225–250
55. Miwa, S., Treumann, A., Bell, A., Vistoli, G., Nelson, G., Hay, S., and Von Zglinicki, T. (2016) Carboxylesterase converts Amplex red to resorufin: Implications for mitochondrial H<sub>2</sub>O<sub>2</sub> release assays. *Free Radic. Biol. Med.* **90**, 173–183
56. Quinlan, C. L., Perevoschikova, I. V., Goncalves, R. L. S., Hey-Mogensen, M., and Brand, M. D. (2013) The determination and analysis of site-specific rates of mitochondrial reactive oxygen species production. *Methods Enzymol.* **526**, 189–217
57. Goncalves, R. L. S., Watson, M. A., Wong, H. S., Orr, A. L., and Brand, M. D. (2020) The use of site-specific suppressors to measure the relative contributions of different mitochondrial sites to skeletal muscle superoxide and hydrogen peroxide production. *Redox Biol.* **28**, 101341
58. Anderson, E. J., Lustig, M. E., Boyle, K. E., Woodlief, T. L., Kane, D. A., Lin, C. Te, Price, J. W., Kang, L., Rabinovitch, P. S., Szeto, H. H., Houmard, J. A., Cortright, R. N., Wasserman, D. H., and Neuffer, P. D. (2009) Mitochondrial H<sub>2</sub>O<sub>2</sub> emission and cellular redox state link excess fat intake to insulin resistance in both rodents and humans. *J. Clin. Invest.* **119**, 573–581
59. Sverdlov, A. L., Elezaby, A., Qin, F., Behring, J. B., Luptak, I., Calamaras, T. D., Siwik, D. A., Miller, E. J., Liesa, M., Shirihai, O. S., Pimentel, D. R., Cohen, R. A., Bachschmid, M. M., and Colucci, W. S. (2016) mitochondrial reactive oxygen species mediate cardiac structural, functional, and mitochondrial consequences of diet-induced metabolic heart disease. *J. Am. Heart Assoc.* 10.1161/JAHA.115.002555
60. Affourtit, C., Quinlan, C. L., and Brand, M. D. (2012) Measurement of proton leak and electron leak in isolated mitochondria. *Methods Mol. Biol.* **810**, 165–182



61. Lu, Y. W., Galbraith, L., Herndon, J. D., Lu, Y. L., Pras-Raves, M., Vervaart, M., Van Kampen, A., Luyf, A., Koehler, C. M., McCaffery, J. M., Gottlieb, E., Vaz, F. M., and Claypool, S. M. (2016) Defining functional classes of Barth syndrome mutation in humans. *Hum. Mol. Genet.* 10.1093/hmg/ddw046
62. Sun, G., Yang, K., Zhao, Z., Guan, S., Han, X., and Gross, R. W. (2008) Matrix-assisted laser desorption/ionization time-of-flight mass spectrometric analysis of cellular glycerophospholipids enabled by multiplexed solvent dependent analyte-matrix interactions. *Anal. Chem.* **80**, 7576–7585
63. Tschöp, M. H., Speakman, J. R., Arch, J. R. S., Auwerx, J., Brüning, J. C., Chan, L., Eckel, R. H., Farese, R. V., Galgani, J. E., Hambly, C., Herman, M. A., Horvath, T. L., Kahn, B. B., Kozma, S. C., Maratos-Flier, E., Müller, T. D., Münzberg, H., Pfluger, P. T., Plum, L., Reitman, M. L., Rahmouni, K., Shulman, G. I., Thomas, G., Kahn, C. R., and Ravussin, E. (2012) A guide to analysis of mouse energy metabolism. *Nat. Methods.* 10.1038/nmeth.1806
64. Bartelt, A., Widenmaier, S. B., Schlein, C., Johann, K., Goncalves, R. L. S., Eguchi, K., Fischer, A. W., Parlakgöl, G., Snyder, N. A., Nguyen, T. B., Bruns, O. T., Franke, D., Bawendi, M. G., Lynes, M. D., Leiria, L. O., Tseng, Y. H., Inouye, K. E., Arruda, A. P., and Hotamisligil, G. S. (2018) Brown adipose tissue thermogenic adaptation requires Nrfl-mediated proteasomal activity. *Nat. Med.* **24**, 292–303

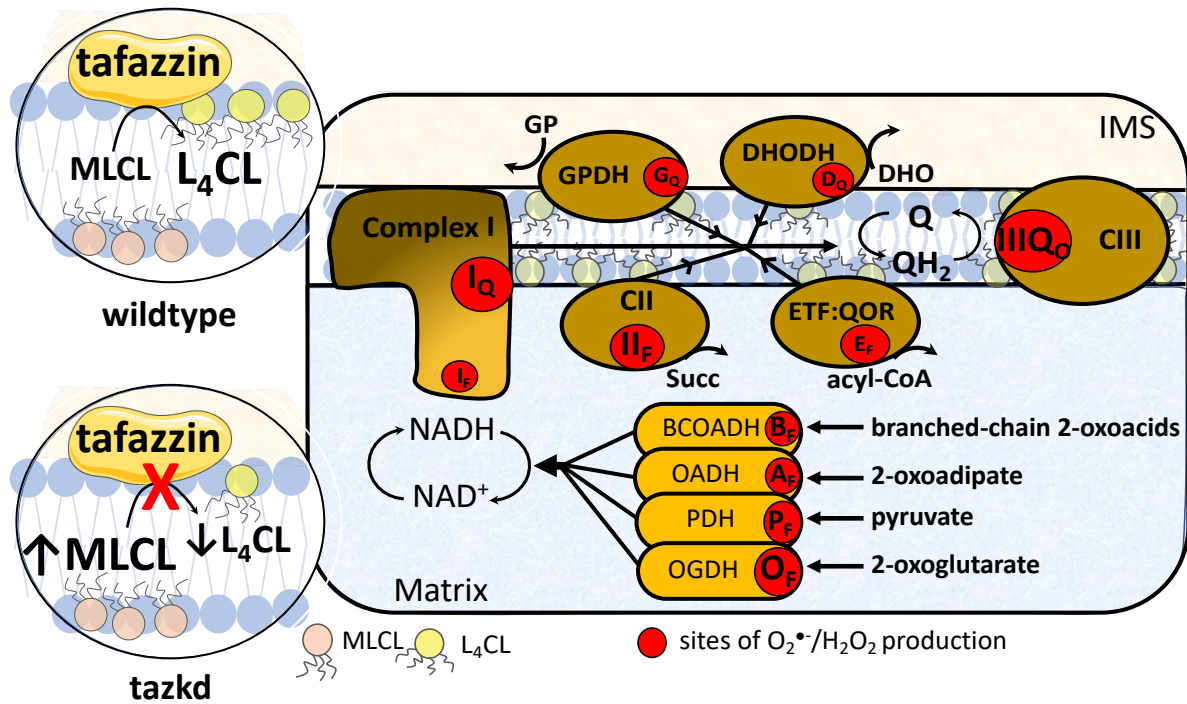

Figure 1 – Tafazzin deficiency and the sites of superoxide/ $H_2O_2$  in the mitochondria. Tafazzin is an acyltransferase important for remodeling cardiolipin to its physiologically relevant form, tetralinoleoyl cardiolipin ( $L_4CL$ ) (circle on top left, wildtype). Mutations in the tafazzin gene alter the cardiolipin profile in the mitochondria and increase the levels of the intermediate, monolysocardiolipin (MLCL) (circle on bottom left, tazkd). Cardiolipin tightly interacts with and stabilize components of the electron transport chain (ETC) and aberrant cardiolipin profile is associated with higher mitochondrial superoxide ( $O_2^{\bullet-}$ ) and hydrogen peroxide ( $H_2O_2$ ) production. There are eleven sites with the capacity to produce  $O_2^{\bullet-}/H_2O_2$  in mitochondria. These sites are associated with the ETC and substrate oxidation enzymes, and are represented by red circles. Reduced substrates from metabolism are transported into the mitochondria where they are oxidized; the electrons enter the ETC via enzymes that operate in close proximity to the NADH/ $NAD^+$  redox potential and enzymes that operate in close proximity to the ubiquinol/ubiquinone ( $QH_2/Q$ ) redox potential. The electrons flow from the NADH- and Q-pool to complex III then to cytochrome *c* and to complex IV, which finally transfers four electrons to oxygen, producing water. The sites associated with the enzymes in the NADH isopotential group and able to generate  $O_2^{\bullet-}/H_2O_2$  are the flavin/lipoate of the dehydrogenases of branched chain 2-oxoacids (BCOADH,  $B_F$ ), 2-oxoadipate (OADH,  $A_F$ ), pyruvate (PDH,  $P_F$ ), 2-oxoglutarate (OGDH,  $O_F$ ) and the flavin site of complex I ( $I_F$ ). The sites in the Q isopotential group are the flavin site of complex II ( $II_F$ ) and the electron transfer flavoprotein (ETF) and ETF:ubiquinone oxidoreductase (ETF:QOR) system ( $E_F$ ) and the ubiquinone binding sites of dehydrogenases of glycerol phosphate (GPDH,  $G_F$ ) and dihydroorotate (DHODH,  $D_Q$ ) and the outer quinol site of complex III,  $IIIQ_0$ . Electrons are transferred from the NADH- to the Q-pool via site  $I_Q$  in complex I, which has a high capacity for  $O_2^{\bullet-}/H_2O_2$  production. The diameters of the red circles are roughly proportional to their mean capacity for  $O_2^{\bullet-}/H_2O_2$  generation in heart and skeletal muscle. IMS, intermembrane space; CII, complex II; CIII, complex III.

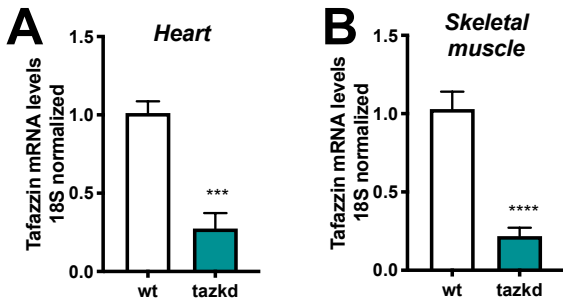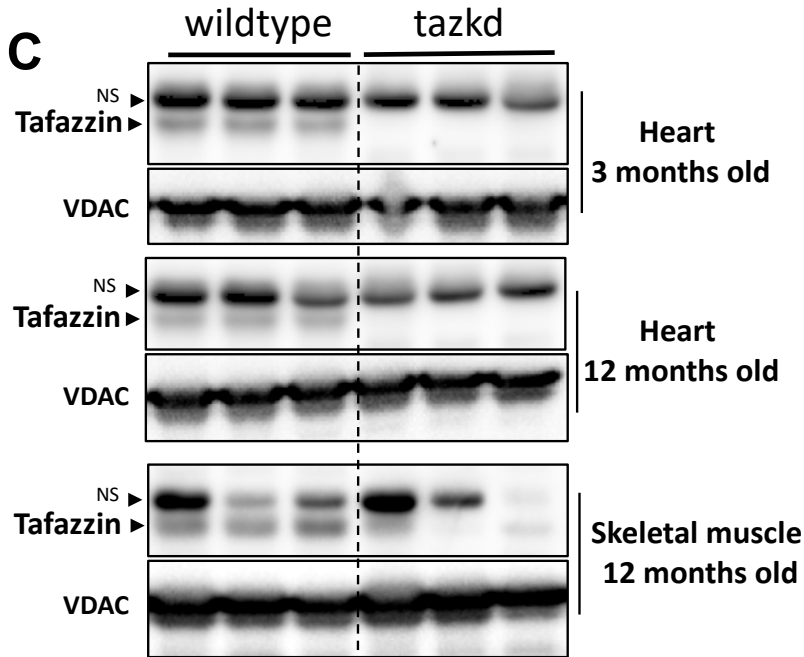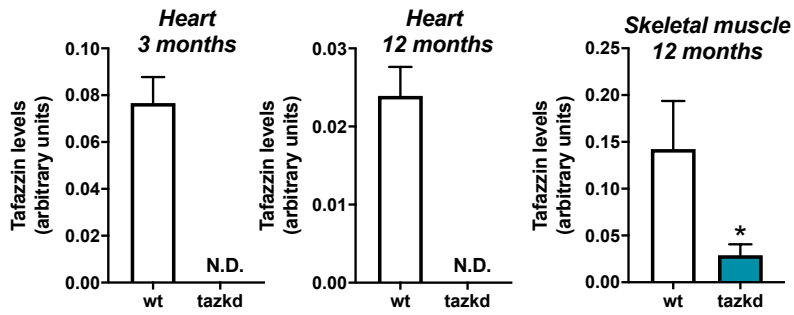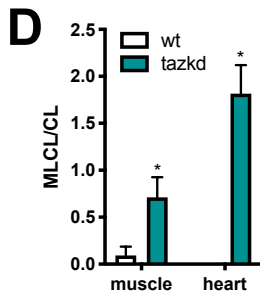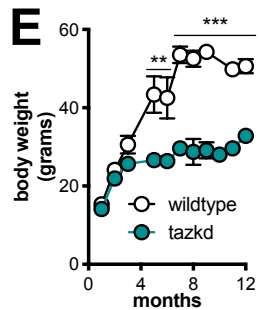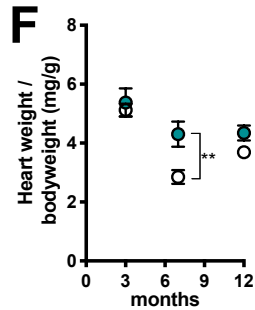

Figure 2- Tafazzin knockdown results in altered cardiolipin levels and protects from weight gain. **A.** Tafazzin mRNA levels in the heart and **B.** in the skeletal muscle of wildtype and tafazzin knockdown mice (tazkd). **C.** Upper, Western blot of tafazzin protein in heart extracts of 3 and 12 month-old wildtype and tazkd mice and in skeletal muscle extracts of 12 month-old wildtype and tafazzin knockdown mice probed with anti-tafazzin antibodies (61). VDAC was used as a loading control. Bottom, densitometric analysis of Western blots from the upper panel C, tafazzin levels were normalized by VDAC levels, NS, non-specific band. **D.** Monolysocardiolipin (MLCL) and cardiolipin (CL) levels were determined by high-performance liquid chromatography in heart and skeletal muscle isolated mitochondria from wildtype and tazkd mice; an elevated ratio of MLCL/CL indicates a defect in CL remodeling. **E.** Body weights of wildtype and tazkd mice. **F.** Heart weight normalized by total body weight. Values are mean  $\pm$  SEM,  $n \geq 3$ . \*,  $p < 0.05$ ; \*\*\*,  $p < 0.001$  using Students t-test. \*\*, 2-way ANOVA, Sidak's post-test.

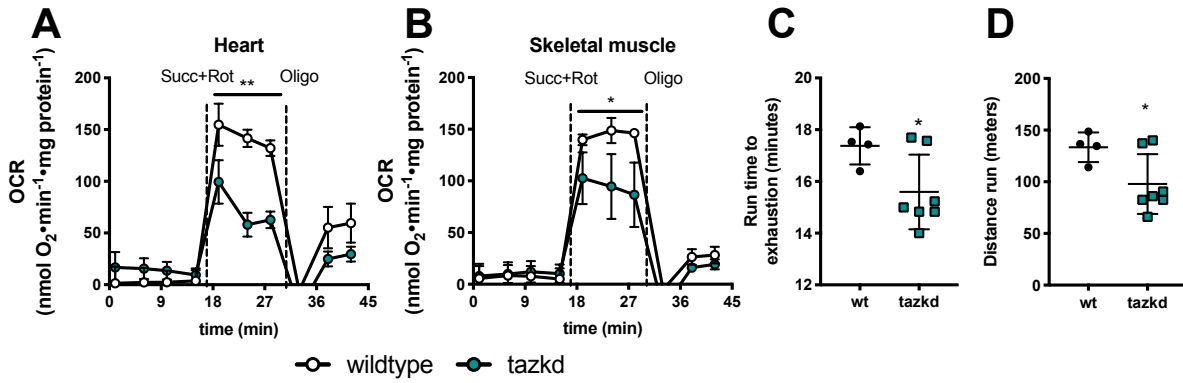

Figure 3- Mitochondrial oxygen consumption rates (OCR) and animal endurance capacity in 12 month-old tazkd mice. **A.** Oxygen consumption rates of mitochondria isolated from heart and **B.** skeletal muscle oxidizing 5 mM succinate in the presence of 4  $\mu$ M rotenone. Basal rates were measured in the presence of 1 mM ADP. **C.** Duration and **D.** distance run by 12 month-old wildtype and tazkd mice until exhaustion. Values are mean  $\pm$  SEM, n=3. \*, p<0.05 using Students t-test.

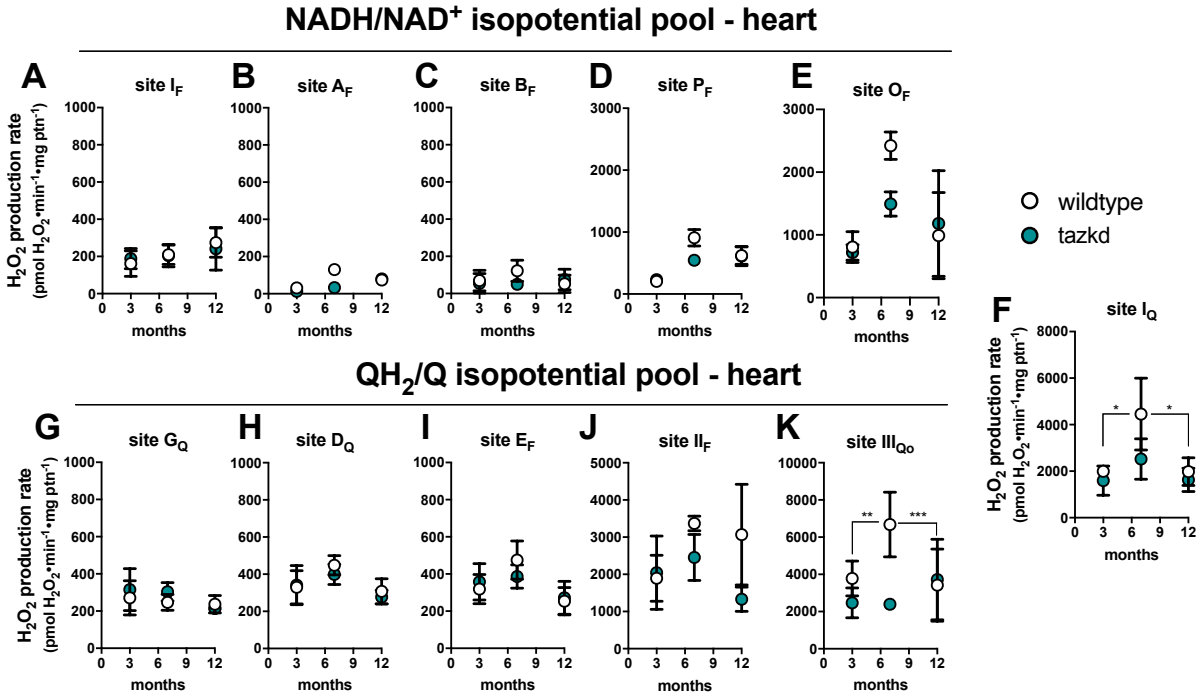

Figure 4. Maximum rate of superoxide/hydrogen peroxide production in isolated heart mitochondria from wildtype and tazkd mice at 3, 8 and 12 months of age. The rate of superoxide/hydrogen peroxide generated by sites associated with the NADH/NAD<sup>+</sup> (A-E) and QH<sub>2</sub>/Q (G-H) isopotential pools. In the NADH/NAD<sup>+</sup> isopotential pool, the rate of superoxide/H<sub>2</sub>O<sub>2</sub> production was measured from the flavin (F) binding sites of: (A) complex I (site I<sub>F</sub>), (B) 2-oxoadipate dehydrogenase (site A<sub>F</sub>), (C) branched chain 2-oxoacid dehydrogenase (site B<sub>F</sub>), (D) pyruvate dehydrogenase (site P<sub>F</sub>), and (E) 2-oxoglutarate dehydrogenase (site O<sub>F</sub>). Complex I produces superoxide/H<sub>2</sub>O<sub>2</sub> from two sites: (A) site I<sub>F</sub> and (F) site I<sub>Q</sub> (ubiquinone (Q) binding site). In sites associated with the QH<sub>2</sub>/Q isopotential pool, the rate of superoxide/hydrogen peroxide production was measured from (G) site G<sub>Q</sub> (glycerol 3-phosphate dehydrogenase), (H) site D<sub>Q</sub>, in dihydroorotate dehydrogenase, (I) site E<sub>F</sub>, in the electron transfer flavoprotein (ETF) and ETF:ubiquinone oxidoreductase (ETF:QOR) system, (J) site II<sub>F</sub>, in complex II, and (K) site III<sub>Qo</sub>, in complex III. Values are mean ± SEM n<sub>≥</sub>3 and were normalized by mitochondrial protein (ptn). 2-way ANOVA was used to determine significance. H<sub>2</sub>O<sub>2</sub> production rate from sites I<sub>Q</sub> and III<sub>Qo</sub> is greater in 7 month-old compared to 3 and 12 month-old in wildtype (2way ANOVA, age: p<0.003, interaction p=0.1727) but not in tazkd mice (2-way ANOVA, age: p=0.6422, interaction: p=0.9998).

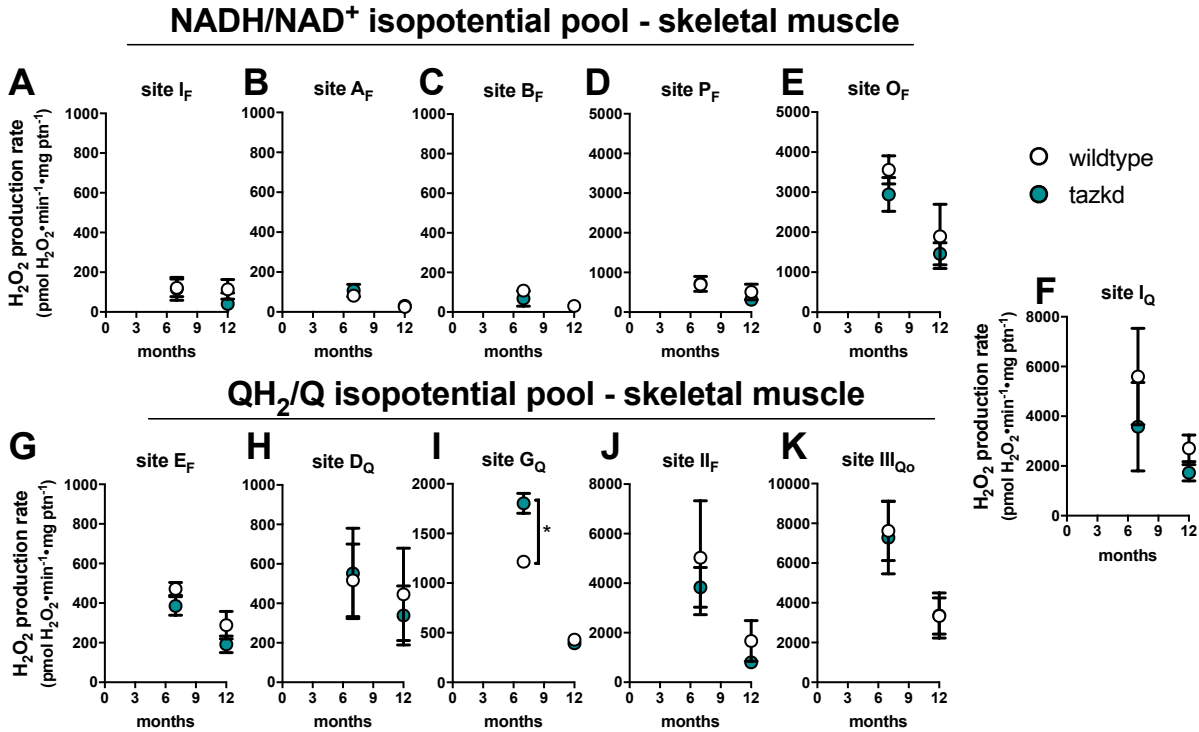

Figure 5. Maximum rate of sites generating superoxide/hydrogen peroxide in isolated skeletal muscle mitochondria from wildtype and *tazkd* mice at 3, 8 and 12 months of age. The rate of superoxide/hydrogen peroxide generated by sites associated with the NADH/NAD<sup>+</sup> (A-E) and QH<sub>2</sub>/Q (G-H) isopotential pools. In the NADH/NAD<sup>+</sup> isopotential pool, the rate of superoxide/H<sub>2</sub>O<sub>2</sub> production was measured from the flavin (F) binding sites of: (A) complex I (site I<sub>F</sub>), (B) 2-oxoadipate dehydrogenase (site A<sub>F</sub>), (C) branched chain 2-oxoacid dehydrogenase (site B<sub>F</sub>), (D) pyruvate dehydrogenase (site P<sub>F</sub>), and (E) 2-oxoglutarate dehydrogenase (site O<sub>F</sub>). Complex I produce superoxide/H<sub>2</sub>O<sub>2</sub> from two sites: (A) site I<sub>F</sub> and (F) site I<sub>Q</sub> (ubiquinone (Q) binding site). In sites associated with the QH<sub>2</sub>/Q isopotential pool, the rate of superoxide/hydrogen peroxide production was measured from (G) site E<sub>F</sub>, in the electron transfer flavoprotein (ETF) and ETF:ubiquinone oxidoreductase (ETF:QOR) system, (H) site D<sub>Q</sub>, in dihydroorotate dehydrogenase, (I) site G<sub>Q</sub> (glycerol 3-phosphate dehydrogenase), (J) site II<sub>F</sub>, in complex II, and (K) site III<sub>Qo</sub>, in complex III. Values are mean ± SEM, n ≥ 3 and were normalized by mitochondrial protein (ptn). \*p < 0.001 2-way ANOVA.

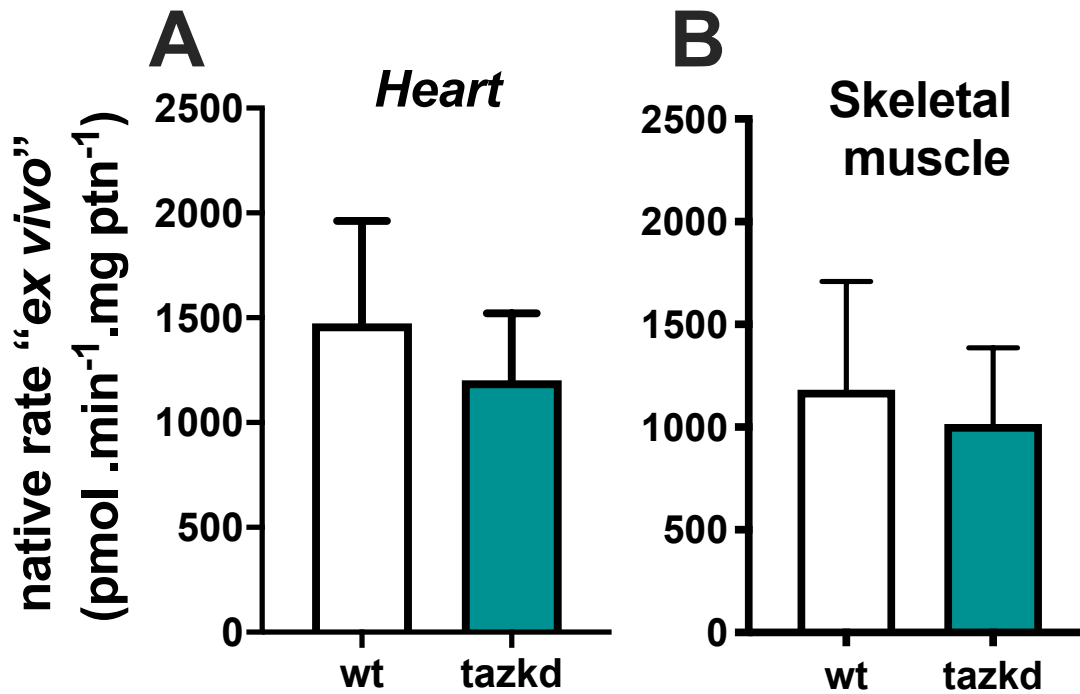

Figure 6. Native *ex vivo* rates of superoxide/hydrogen peroxide production from isolated mitochondria from 12 month-old mice. Mitochondrial H<sub>2</sub>O<sub>2</sub> production rate was measured in complex media mimicking the cytosol of (A) heart and (B) skeletal muscle “at rest” (see methods for media composition). Values are mean ± SEM, n≥3 normalized by mitochondrial protein (ptn). p>0.05 Student’s t-test.



Supplementary Table 1. Metabolite concentrations at rest in cytosol of heart and skeletal muscle and the composition of “ex vivo” media mimicking cytosol at rest. Data for the metabolites assumed relevant, from literature for rat heart (cited here) and skeletal muscle (from (1)). For heart, calculations assume heart wet weight is 79% water, 79% of which is intracellular (5, 29, 47–49). Values are corrected for distribution of intracellular metabolites between cytosol and mitochondria where known (24, 36, 50), otherwise assuming liver distribution (51–56), and that mitochondrial volume is 25% of intracellular (47, 48). Values are rounded to convenient whole numbers. Total  $Mg^{2+}$  and  $Ca^{2+}$  concentrations to give the targeted free values were calculated using the software MaxChelator. Targeted free calcium concentrations were 0.1  $\mu M$  (heart) and 0.05  $\mu M$  (skeletal muscle). Targeted free  $Mg^{2+}$  concentrations were 1200  $\mu M$  (heart) and 600  $\mu M$  (skeletal muscle). Targeted  $Na^+$  concentrations were 18 mM (heart) and 16 mM (skeletal muscle). Media had  $K^+$  and  $Cl^-$  adjusted as shown to give a target osmolarity of 290 mOsm (actual 284 mOsm) (57–59). Total  $K^+$  concentrations were 55.5 mM (heart) and 80 mM (skeletal muscle). Both media were supplemented with 0.3 g BSA/100 ml, 10 mM Hepes, 2 mM EGTA, 2  $\mu g/mL$  oligomycin. “Rest” metabolite concentrations were mean literature values from the cited references for the hearts of animals at rest or from isolated Langendorff perfused heart beating at the spontaneous rate.

| Metabolite                 | Literature value for concentration in cytosol and value in medium mimicking cytosol ( $\mu\text{M}$ ) |                 | References for heart metabolite concentrations (for skeletal muscle references see (1)) |
|----------------------------|-------------------------------------------------------------------------------------------------------|-----------------|-----------------------------------------------------------------------------------------|
|                            | Heart                                                                                                 | Skeletal Muscle |                                                                                         |
| Acetoacetate               | 0                                                                                                     | 100             | (2)                                                                                     |
| 3-Hydroxybutyrate          | 50                                                                                                    | 300             | (2)                                                                                     |
| Glycerol 3-phosphate       | 400                                                                                                   | 100             | (2–7)                                                                                   |
| Dihydroxyacetone phosphate | 40                                                                                                    | 50              | (3, 5–9)                                                                                |
| Citrate                    | 100                                                                                                   | 100             | (2, 3, 15–23, 4, 5, 9–14)                                                               |
| Malate                     | 150                                                                                                   | 200             | (2, 10–13, 16–18, 21, 23–25)                                                            |
| 2-oxoglutarate             | 50                                                                                                    | 30              | (2, 10–12, 14–18, 21, 23–26)                                                            |
| Pyruvate                   | 130                                                                                                   | 100             | (2, 5–7, 9, 13, 17, 18, 24)                                                             |
| Succinate                  | 135                                                                                                   | 200             | (10, 15, 18, 25, 27)                                                                    |
| Alanine                    | 2000                                                                                                  | 2500            | (11, 14, 15, 17, 18, 23, 28, 29)                                                        |
| Arginine                   | 400                                                                                                   | 500             | (15, 23, 28)                                                                            |
| Aspartate                  | 4500                                                                                                  | 1500            | (7, 10–18, 21, 23, 28, 29)                                                              |
| Glutamate                  | 5000                                                                                                  | 1500            | (7, 10–18, 21, 23, 26, 28, 29)                                                          |
| Glutamine                  | 8000                                                                                                  | 6000            | (14, 15, 18, 23, 29)                                                                    |
| Glycine                    | 1000                                                                                                  | 7000            | (14, 15, 23, 28, 29)                                                                    |
| Isoleucine                 | 80                                                                                                    | 150             | (14, 23, 28–30)                                                                         |
| Leucine                    | 130                                                                                                   | 200             | (14, 23, 28–30)                                                                         |
| Lysine                     | 800                                                                                                   | 1250            | (15, 23, 28)                                                                            |
| Proline                    | 350                                                                                                   | 500             | (28)                                                                                    |
| Serine                     | 1000                                                                                                  | 2000            | (14, 15, 23, 28, 29)                                                                    |
| Taurine                    | 70000                                                                                                 | 40000           | (14, 15, 23, 28, 31)                                                                    |
| Valine                     | 150                                                                                                   | 300             | (14, 28–30)                                                                             |
| Carnitine                  | 1700                                                                                                  | 1000            | (32–36)                                                                                 |
| Acetylcarnitine            | 80                                                                                                    | 500             | (12, 13, 33, 35)                                                                        |
| Palmitoylcarnitine         | 5                                                                                                     | 10              | (37)                                                                                    |
| Basic media                |                                                                                                       |                 |                                                                                         |
| ATP                        | 9000                                                                                                  | 6000            | (2, 4, 5, 7, 12, 13, 20, 23, 26, 38–42)                                                 |
| $\text{KH}_2\text{PO}_4$   | 6000                                                                                                  | 3000            | (5, 7, 9, 23, 26, 38, 40, 42)                                                           |
| EGTA                       | 2000                                                                                                  | 2000            |                                                                                         |
| KCl                        | 12790                                                                                                 | 52850           |                                                                                         |
| NaCl                       | 6000                                                                                                  | 3167            | (43)                                                                                    |
| $\text{MgCl}_2$            | 9224                                                                                                  | 5467            | (9)                                                                                     |

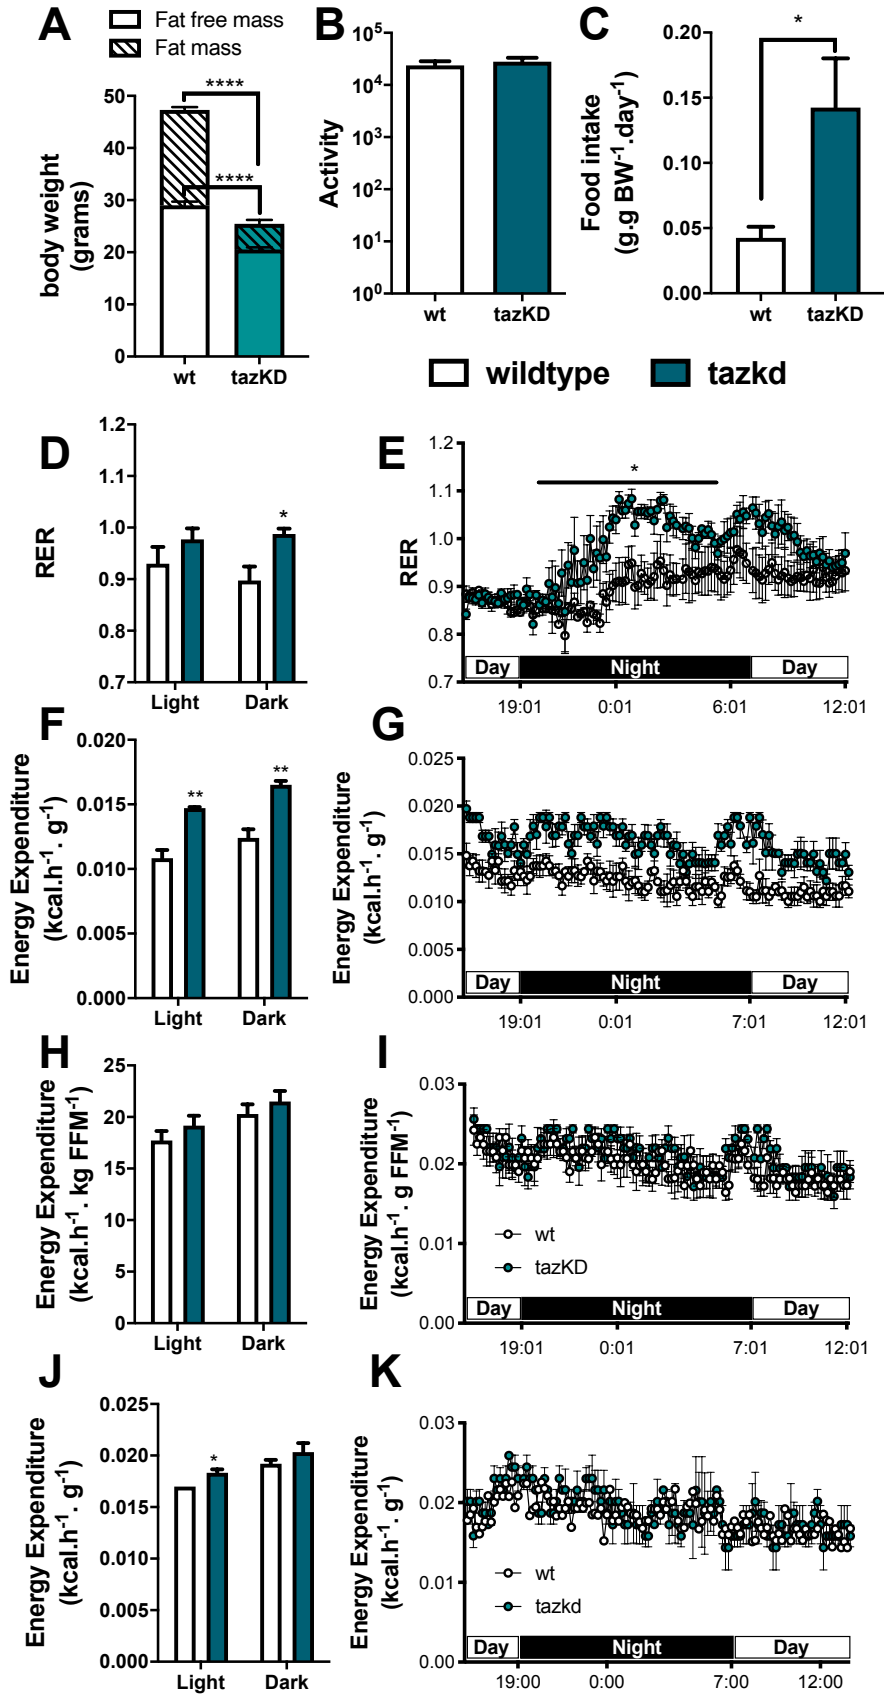

Supplementary figure 1 – Metabolic profile of tazkd mice. **A.** body weight, fat mass and fat-free mass of 7-month old wildtype and tazkd mice. **B.** activity, measured by the number of beam breaks in the cage. **C.** food intake normalized by body weight. **D** and **E**, histogram and representative plot of respiratory exchange ratio (RER) of wildtype and tazkd mice over a period of 24 h. **F** and **G**, histogram and representative plot of energy expenditure (normalized by body weight) of wildtype and tazkd mice at 6 months of age over a period of 24 h. **H** and **I**, replot from F and G normalized by fat-free mass. **J** and **K**, histogram and representative plot of energy expenditure (normalized by whole body weight) of wildtype and tazkd mice at 3 months of age over a period of 24 h. Dark and light cycles are shown. Values are mean  $\pm$  SEM, n=4. \*, p<0.05, using Student's t-test. \*\*\*\*, p<0.0001, 2-way ANOVA, Sidak's post test.

## Supplementary references

1. Goncalves, R. L. S., Quinlan, C. L., Perevoshchikova, I. V., Hey-Mogensen, M., and Brand, M. D. (2015) Sites of superoxide and hydrogen peroxide production by muscle mitochondria assessed ex vivo under conditions mimicking rest and exercise. *J. Biol. Chem.* **290**, 209–227
2. Kraupp, O., Adler-Kastner, L., Niessner, H., Plank, B., Chirikdjian, J. J., and Springer, A. (1967) The effects of starvation and of acute and chronic alloxan diabetes on myocardial substrate levels and on liver glycogen in the rat in vivo. *Eur. J. Biochem.* **2**, 197–214
3. Garland, P. B., and Randle, P. J. (1964) Regulation of glucose uptake by muscles. 10. Effects of alloxan-diabetes, starvation, hypophysectomy and adrenalectomy, and of fatty acids, ketone bodies and pyruvate, on the glycerol output and concentrations of free fatty acids, long-chain fatty acyl-coenzyme A, glycerol phosphate and citrate-cycle intermediates in rat heart and diaphragm muscles. *Biochem. J.* **93**, 678–687
4. Denton, R. M., Yorke, R. E., and Randle, P. J. P. (1966) Measurement of concentrations of metabolites in adipose tissue and effects of insulin, alloxan-diabetes and adrenaline. *Biochem. J.* **100**, 407–419
5. Opie, L. H., and Owen, P. (1975) Effects of increased mechanical work by isolated perfused rat heart during production or uptake of ketone bodies. Assessment of mitochondrial oxidized to reduced free nicotinamide adenine dinucleotide ratios and oxaloacetate concentrations. *Biochem. J.* **148**, 403–415
6. Rovetto, M. J., Lamberton, W. F., and Neely, J. R. (1975) Mechanisms of glycolytic inhibition in ischemic rat hearts. *Circ. Res.* **37**, 742–751
7. Williamson, J. R. (1966) Glycolytic control mechanisms. II. Kinetics of intermediate changes during the aerobic-anoxic transition in perfused rat heart. *J. Biol. Chem.* **241**, 5026–5036
8. Garland, P. B., Newsholme, E. A., and Randle, P. J. (1964) Regulation of glucose uptake by muscle. 9. Effects of fatty acids and ketone bodies, and of alloxan-diabetes and starvation, on pyruvate metabolism and on lactate/pyruvate and l-glycerol 3 phosphate/dihydroxyacetone phosphate concentration ratios in rat heart and rat diaphragm muscles. *Biochem. J.* **93**, 665–678
9. Kashiwaya, Y., Sato, K., Tsuchiya, N., Thomas, S., Fell, D. A., Veech, R. L., and Passonneau, J. V. (1994) Control of glucose utilization in working perfused rat heart. *J. Biol. Chem.* **269**, 25502–25514
10. Bowman, R. H. (1966) Effects of diabetes, fatty acids, and ketone bodies on tricarboxylic acid cycle metabolism in the perfused rat heart. *J. Biol. Chem.* **241**, 3041–3048
11. Randle, P. J., England, P. J., and Denton, R. M. (1970) Control of the tricarboxylate cycle and its interactions with glycolysis during acetate utilization in rat heart. *Biochem. J.* **117**, 677–695
12. Neely, J. R., Denton, R. M., England, P. J., and Randle, P. J. (1972) The effects of increased heart work on the tricarboxylate cycle and its interactions with glycolysis in the perfused rat heart. *Biochem. J.* **128**, 147–159
13. McAllister, A., Allison, S. P., and Randle, P. J. (1973) Effects of dichloroacetate on the

- metabolism of glucose, pyruvate, acetate, 3-hydroxybutyrate and palmitate in rat diaphragm and heart muscle in vitro and on extraction of glucose, lactate, pyruvate and free fatty acids by dog heart in vivo. *Biochem. J.* **134**, 1067–1081
14. Davis, E. J., and Bremer, J. (1973) Studies with isolated surviving rat hearts: interdependence of free amino acids and citric-acid-cycle intermediates. *Eur. J. Biochem.* **38**, 86–97
  15. Takala, T., Hiltunen, J. K., and Hassinen, I. E. (1980) The mechanism of ammonia production and the effect of mechanical work load on proteolysis and amino acid catabolism in isolated perfused rat heart. *Biochem. J.* **192**, 285–295
  16. Nuutinen, E. M., Peuhkurinen, K. J., Pietiläinen, E. P., Hiltunen, J. K., and Hassinen, I. E. (1981) Elimination and replenishment of tricarboxylic acid-cycle intermediates in myocardium. *Biochem. J.* **194**, 867–875
  17. Peuhkurinen, K. J., Nuutinen, E. M., Pietiläinen, E. P., Hiltunen, J. K., and Hassinen, I. E. (1982) Role of pyruvate carboxylation in the energy-linked regulation of pool sizes of tricarboxylic acid-cycle intermediates in the myocardium. *Biochem. J.* **208**, 577–581
  18. Peuhkurinen, K. J., Takala, T. E., Nuutinen, E. M., and Hassinen, I. E. (1983) Tricarboxylic acid cycle metabolites during ischemia in isolated perfused rat heart. *Am. J. Physiol. Circ. Physiol.* **244**, H281–H288
  19. Chen, V., Ianuzzo, C. D., Fong, B. C., and Spitzer, J. J. (1984) The effects of acute and chronic diabetes on myocardial metabolism in rats. *Diabetes.* **33**, 1078–1084
  20. Zorzano, A., Balon, T. W., Brady, L. J., Rivera, P., Garetto, L. P., Young, J. C., Goodman, M. N., and Ruderman, N. B. (1985) Effects of starvation and exercise on concentrations of citrate, hexose phosphates and glycogen in skeletal muscle and heart. Evidence for selective operation of the glucose-fatty acid cycle. *Biochem. J.* **232**, 585–591
  21. Russell, R. R., and Taegtmeyer, H. (1991) Changes in citric acid cycle flux and anaplerosis antedate the functional decline in isolated rat hearts utilizing acetoacetate. *J. Clin. Invest.* **87**, 384–390
  22. Lin, S., Yang, Z., Liu, H., and Cai, Z. (2011) Metabolomic analysis of liver and skeletal muscle tissues in C57BL/6J and DBA/2J mice exposed to 2,3,7,8-tetrachlorodibenzo-p-dioxin. *Mol. Biosyst.* **7**, 1956
  23. Safer, B., and Williamson, J. R. (1973) Mitochondrial-cytosolic interactions in perfused rat heart. Role of coupled transamination in repletion of citric acid cycle intermediates. *J. Biol. Chem.* **248**, 2570–2579
  24. Sundqvist, K. E., Heikkilä, J., Hassinen, I. E., and Hiltunen, J. K. (1987) Role of NADP<sup>+</sup>-linked malic enzymes as regulators of the pool size of tricarboxylic acid-cycle intermediates in the perfused rat heart. *Biochem. J.* **243**, 853–857
  25. Vincent, G., Khairallah, M., Bouchard, B., and Des Rosiers, C. (2003) Metabolic phenotyping of the diseased rat heart using <sup>13</sup>C-substrates and ex vivo perfusion in the working mode. *Mol. Cell. Biochem.* **242**, 89–99
  26. Nishiki, K., Erecinska, M., and Wilson, D. F. (1978) Energy relationships between cytosolic metabolism and mitochondrial respiration in rat heart. *Am. J. Physiol. Physiol.* **234**, C73–C81
  27. Penney, D. G., and Cascarano, J. (1970) Anaerobic rat heart. Effects of glucose and tricarboxylic acid-cycle metabolites on metabolism and physiological performance.

- Biochem. J.* **118**, 221–227
28. Scharff, R., and Wool, I. (1966) Effect of diabetes on the concentration of amino acids in plasma and heart muscle of rats. *Biochem. J.* **99**, 173–178
  29. Adibi, S. A. (1971) Interrelationships between level of amino acids in plasma and tissues during starvation. *Am. J. Physiol.* **221**, 829–838
  30. Hutson, S. M., and Harper, A. E. (1981) Blood and tissue branched-chain amino and  $\alpha$ -keto acid concentrations: Effect of diet, starvation, and disease. *Am. J. Clin. Nutr.* **34**, 173–183
  31. Awapara, J. (1956) The taurine concentration of organs from fed and fasted rats. *J. Biol. Chem.* **218**, 571–576
  32. Marquis, N. R., and Fritz, I. B. (1964) Enzymological determination of free carnitine concentrations in rat tissues. *J. Lipid Res.* **5**, 184–187
  33. Pearson, D. J., and Tubbs, P. K. (1967) Carnitine and derivatives in rat tissues. *Biochem. J.* **105**, 953–963
  34. Brass, E. P., and Hoppell, C. L. (1978) Carnitine metabolism in the fasting rat. *J. Biol. Chem.* **253**, 2688–2693
  35. Whitmer, J. T., Idell-Wenger, J. A., Rovetto, M. J., and Neely, J. R. (1978) Control of fatty acid metabolism in ischemic and hypoxic hearts. *J. Biol. Chem.* **253**, 4305–4309
  36. Idell-Wenger, J. A., Grottyohann, L. W., and Neely, J. R. (1978) Coenzyme A and carnitine distribution in normal and ischemic hearts. *J. Biol. Chem.* **253**, 4310–4318
  37. Su, X., Han, X., Mancuso, D. J., Abendschein, D. R., and Gross, R. W. (2005) Accumulation of long-chain acylcarnitine and 3-hydroxy acylcarnitine molecular species in diabetic myocardium: Identification of alterations in mitochondrial fatty acid processing in diabetic myocardium by shotgun lipidomics. *Biochemistry.* **44**, 5234–5245
  38. Newsholme, E. A., and Randle, P. J. (1964) Regulation of glucose uptake by muscle. 7. Effects of fatty acids, ketone bodies and pyruvate, and of alloxan-diabetes, starvation, hypophysectomy and adrenalectomy, on the concentrations of hexose phosphates, nucleotides and inorganic phosphate in perfus. *Biochem. J.* **93**, 641–651
  39. Zou, Z., Sasaguri, S., Rajesh, K. G., and Suzuki, R. (2002) *dl*-3-hydroxybutyrate administration prevents myocardial damage after coronary occlusion in rat hearts. *Am. J. Physiol. - Heart Circ. Physiol.* **283**, H1968–H1974
  40. From, A. H. L., Petein, M. A., Michurski, S. P., Zimmer, S. D., and Uğurbil, K. (1986) <sup>31</sup>P-NMR studies of respiratory regulation in the intact myocardium. *FEBS Lett.* **206**, 257–261
  41. Jenkins, R. L., McDaniel, H. G., Digerness, S., Parrish, S. W., and Ong, R. L. (1988) Adenine nucleotide metabolism in hearts of diabetic rats. Comparison to diaphragm, liver, and kidney. *Diabetes.* **37**, 629–636
  42. Hitchins, S., Cieslar, J. M., and Dobson, G. P. (2001) <sup>31</sup>P NMR quantitation of phosphorus metabolites in rat heart and skeletal muscle in vivo. *Am. J. Physiol. Circ. Physiol.* **281**, H882–H887
  43. Tosaki, A., Engelman, D. T., Engelman, R. M., and Das, D. K. (1996) The evolution of diabetic response to ischemia/reperfusion and preconditioning in isolated working rat hearts. *Cardiovasc. Res.* **31**, 526–536
  44. Lagadic-Gossmann, D., Buckler, K. J., Le Prigent, K., and Feuvray, D. (1996) Altered Ca<sup>2+</sup> handling in ventricular myocytes isolated from diabetic rats. *Am. J. Physiol. - Heart Circ.*

- Physiol.* **270**, H1529–H1537
45. Neubauer, S., Horn, M., Naumann, A., Tian, R., Hu, K., Laser, M., Friedrich, J., Gaudron, P., Schnackerz, K., and Ingwall, J. S. (1995) Impairment of energy metabolism in intact residual myocardium of rat hearts with chronic myocardial infarction. *J. Clin. Invest.* **95**, 1092–1100
  46. Khandoudi, N., Bernard, M., Cozzone, P., and Feuvray, D. (1995) Mechanisms of intracellular pH regulation during postischemic reperfusion of diabetic rat hearts. *Diabetes.* **44**, 196–202
  47. Aliev, M. (2002) Water content and its intracellular distribution in intact and saline perfused rat hearts revisited. *Cardiovasc. Res.* **53**, 48–58
  48. Vinnakota, K. C., and Bassingthwaight, J. B. (2004) Myocardial density and composition: a basis for calculating intracellular metabolite concentrations. *Am. J. Physiol. Circ. Physiol.* **286**, H1742–H1749
  49. Cieslar, J., Huang, M.-T., and Dobson, G. P. (1998) Tissue spaces in rat heart, liver, and skeletal muscle in vivo. *Am. J. Physiol. Integr. Comp. Physiol.* **275**, R1530–R1536
  50. Kauppinen, R. A., Hiltunen, J. K., and Hassinen, I. E. (1982) Compartmentation of citrate in relation to the regulation of glycolysis and the mitochondrial transmembrane proton electrochemical potential gradient in isolated perfused rat heart. *Biochim. Biophys. Acta - Bioenerg.* **681**, 286–291
  51. Akerboom, T. P. M., Bookelman, H., Zuurendonk, P. F., van der Meer, R., and Tager, J. M. (1978) Intramitochondrial and extramitochondrial concentrations of adenine nucleotides and inorganic phosphate in isolated hepatocytes from fasted rats. *Eur. J. Biochem.* **84**, 413–420
  52. Brocks, D. G., Siess, E. A., and Wieland, O. H. (1980) Validity of the digitonin method for metabolite compartmentation in isolated hepatocytes. *Biochem. J.* **188**, 207–212
  53. Hensgens, H. E. S. J., Meijer, A. J., Williamson, J. R., Gimpel, J. A., and Tager, J. M. (1978) Proline metabolism in isolated rat liver cells. *Biochem. J.* **170**, 699–707
  54. Siess, E. A., Brocks, D. G., Lattke, H. K., and Wieland, O. H. (1977) Effect of glucagon on metabolite compartmentation in isolated rat liver cells during gluconeogenesis from lactate. *Biochem. J.* **166**, 225–235
  55. Soboll, S., Horst, C., Hummerich, H., Schumacher, J. P., and Seitz, H. J. (1992) Mitochondrial metabolism in different thyroid states. *Biochem. J.* **281**, 171–173
  56. Soboll, S., Akerboom, T. P. M., Schwenke, W. D., Haase, R., and Sies, H. (1980) Mitochondrial and cytosolic ATP/ADP ratios in isolated hepatocytes. A comparison of the digitonin method and the non-aqueous fractionation procedure. *Biochem. J.* **192**, 951–954
  57. Baraban, S. C., Bellingham, M. C., Berger, A. J., and Schwartzkroin, P. A. (1997) Osmolarity modulates K<sup>+</sup> channel function on rat hippocampal interneurons but not CA1 pyramidal neurons. *J. Physiol.* **498**, 679–689
  58. Gillin, A. G., and Sands, J. M. (1992) Characteristics of osmolarity-stimulated urea transport in rat IMCD. *Am. J. Physiol. - Ren. Fluid Electrolyte Physiol.* **262**, F1061–F1067
  59. Makara, J. K., Petheö, G. L., Tóth, A., and Spät, A. (2000) Effect of osmolarity on aldosterone production by rat adrenal glomerulosa cells. *Endocrinology.* **141**, 1705–1710
